# Supplementary material
Source: publisher figshare collection journal article supplement (https://acs.figshare.com/ndownloader/files/4527676)
Supplement: Supplementary file 1 [file 4527676]

data_global
#===========================================================================

_audit_creation_date '2009-01-23'
_audit_creation_method  'from SHELXTL CIF, local template and enCIFer'
_audit_update_record
;   

;

#===========================================================================
# 1. SUBMISSION DETAILS
#===========================================================================

_publ_contact_author_name       'Dr Damon A. Parrish'

_publ_contact_author_address
;
Laboratory for the Structure of Matter
Naval Research Laboratory
Washington, DC 20375
;

_publ_contact_author_email        'damon.parrish@nrl.navy.mil'
_publ_contact_author_fax          '202-767-6874'
_publ_contact_author_phone        '202-404-2141'


_publ_requested_journal           ?
_publ_requested_category         ?
_publ_requested_coeditor_name     ?

_publ_contact_letter
;
; 

#===========================================================================
# 2. PROCESSING SUMMARY  (IUCr Office Use Only)
# Do  NOT  alter anthing in this section.
#===========================================================================
_journal_date_recd_electronic  ?
_journal_date_to_coeditor      ?
_journal_date_from_coeditor    ?
_journal_date_accepted         ?
_journal_date_printers_first   ?
_journal_date_printers_final   ?
_journal_date_proofs_out       ?
_journal_date_proofs_in        ?
_journal_coeditor_name         ?
_journal_coeditor_code         ?
_journal_coeditor_notes
; ?
;
_journal_techeditor_code       ?
_journal_techeditor_notes
; ?
;
_journal_coden_ASTM            ?
_journal_name_full             ?
_journal_year                  ?
_journal_volume                ?
_journal_issue                 ?
_journal_page_first            ?
_journal_page_last             ?
_journal_suppl_publ_number      ?
_journal_suppl_publ_pages       ?

#===========================================================================
# 3. TITLE AND AUTHOR LIST
#===========================================================================

_publ_section_title
;
title
;


loop_
 _publ_author_name
 _publ_author_address
 _publ_author_footnote
'Parrish, Damon A.'
;
Laboratory for the Structure of Matter, Code 6030
Naval Research Laboratory
Washington, DC 20375
;
?
'Shreeve, Jean'ne'
;
Chemsitry Department 
University of Idaho
Moscow, ID, 83843
;
?
'Joo, Young-Hyuk'
;
Chemsitry Department 
University of Idaho
Moscow, ID, 83843
;
?

#===========================================================================
# 4. TEXT
#===========================================================================

_publ_section_abstract
;

;

_publ_section_comment
;
;

_publ_section_exptl_prep
;
;

_publ_section_exptl_refinement
; 
;

_publ_section_references
;
Bruker (2006). APEX2 v2.1-0. Bruker AXS Inc., Madison, Wisconsin, 
USA.

Bruker (2005). SAINT v7.34A. Bruker AXS Inc., Madison, Wisconsin, 
USA.

Bruker (2004). SADABS v2004/1, Bruker AXS Inc., Madison, Wisconsin, 
USA.

Bruker (2004). XPREP v2005/2. Bruker AXS Inc., Madison, Wisconsin, 
USA.

Bruker (2000b). SHELXTL v6.12. Bruker AXS Inc., Madison, Wisconsin, 
USA.
;


_publ_section_figure_captions
;
;


_publ_section_table_legends
; 
;


_publ_section_acknowledgements
;
Crystallographic studies were supported in part by the Office of Naval 
Research (ONR) and the Naval Research Laboratory (NRL).
;

#==========================================================================
 
data_compound8 
 
_audit_creation_date '2009-01-23'
_audit_creation_method  'from SHELXTL CIF, local template and enCIFer'
_chemical_name_systematic 
; 
 1,3-diazido-2-(azidomethyl)propan-2-aminium nitrate 
; 
_chemical_name_common             ? 
_chemical_melting_point           ? 
_chemical_formula_moiety          
 'C4 H9 N10 +1, N1 O3 -1' 
_chemical_formula_sum 
 'C4 H9 N11 O3' 
_chemical_formula_weight          259.22 
 
loop_ 
 _atom_type_symbol 
 _atom_type_description 
 _atom_type_scat_dispersion_real 
 _atom_type_scat_dispersion_imag 
 _atom_type_scat_source 
 'C'  'C'   0.0033   0.0016 
 'International Tables Vol C Tables 4.2.6.8 and 6.1.1.4' 
 'H'  'H'   0.0000   0.0000 
 'International Tables Vol C Tables 4.2.6.8 and 6.1.1.4' 
 'N'  'N'   0.0061   0.0033 
 'International Tables Vol C Tables 4.2.6.8 and 6.1.1.4' 
 'O'  'O'   0.0106   0.0060 
 'International Tables Vol C Tables 4.2.6.8 and 6.1.1.4' 
 
_symmetry_cell_setting            Monoclinic 
_symmetry_space_group_name_H-M    P2(1)/c 
 
loop_ 
 _symmetry_equiv_pos_as_xyz 
 'x, y, z' 
 '-x, y+1/2, -z+1/2' 
 '-x, -y, -z' 
 'x, -y-1/2, z-1/2' 
 
_cell_length_a                    8.7297(16) 
_cell_length_b                    9.0361(17) 
_cell_length_c                    13.415(3) 
_cell_angle_alpha                 90.00 
_cell_angle_beta                  93.330(2) 
_cell_angle_gamma                 90.00 
_cell_volume                      1056.4(3) 
_cell_formula_units_Z             4 
_cell_measurement_temperature     173(2) 
_cell_measurement_reflns_used     ? 
_cell_measurement_theta_min       ? 
_cell_measurement_theta_max       ? 
 
_exptl_crystal_description        'large prism' 
_exptl_crystal_colour             colorless 
_exptl_crystal_size_max           0.89 
_exptl_crystal_size_mid           0.83 
_exptl_crystal_size_min           0.79 
_exptl_crystal_density_meas       ? 
_exptl_crystal_density_diffrn     1.630 
_exptl_crystal_density_method     'not measured' 
_exptl_crystal_F_000              536 
_exptl_absorpt_coefficient_mu     0.138 
_exptl_absorpt_correction_type    'multi-scan'
_exptl_absorpt_process_details 
 'SADABS v2004/1 (Bruker, 2004)'
_exptl_absorpt_correction_T_min   0.801 
_exptl_absorpt_correction_T_max   1.000 
 
_exptl_special_details 
; 
 ? 
; 
 
_diffrn_ambient_temperature       173(2) 
_diffrn_radiation_wavelength      0.71073 
_diffrn_radiation_type           'MoK\a'
_diffrn_radiation_source         'fine focus sealed tube'
_diffrn_radiation_monochromator   graphite 
_diffrn_measurement_device_type  'Bruker SMART APEX II CCD'
_diffrn_measurement_method       '\w scans'
_diffrn_detector_area_resol_mean  ? 
_diffrn_standards_number          ? 
_diffrn_standards_interval_count  ? 
_diffrn_standards_interval_time   ? 
_diffrn_standards_decay_%         ? 
_diffrn_reflns_number             10611 
_diffrn_reflns_av_R_equivalents   0.0272 
_diffrn_reflns_av_sigmaI/netI     0.0236 
_diffrn_reflns_limit_h_min        -11 
_diffrn_reflns_limit_h_max        11 
_diffrn_reflns_limit_k_min        -12 
_diffrn_reflns_limit_k_max        9 
_diffrn_reflns_limit_l_min        -17 
_diffrn_reflns_limit_l_max        17 
_diffrn_reflns_theta_min          2.34 
_diffrn_reflns_theta_max          28.30 
_reflns_number_total              2606 
_reflns_number_gt                 2414 
_reflns_threshold_expression      I>2\s(I)
 
_computing_data_collection        'Bruker APEX2 v2.1-0 (Bruker, 2006)'
_computing_cell_refinement        'Bruker APEX2 v2.1-0 (Bruker, 2006)'
_computing_data_reduction         
;
Bruker SAINT v7.34A (Bruker, 2005), Bruker XPREP v2005/2 (Bruker, 2004)
;
_computing_structure_solution     'Bruker SHELXTL v6.12 (Bruker, 2000b)' 
_computing_structure_refinement   'Bruker SHELXTL v6.12 (Bruker, 2000b)' 
_computing_molecular_graphics     'Bruker SHELXTL v6.12 (Bruker, 2000b)'
_computing_publication_material   'Bruker SHELXTL v6.12 (Bruker, 2000b)'
 
_refine_special_details 
; 
 Refinement of F^2^ against ALL reflections.  The weighted R-factor wR and 
 goodness of fit S are based on F^2^, conventional R-factors R are based 
 on F, with F set to zero for negative F^2^. The threshold expression of 
 F^2^ > 2sigma(F^2^) is used only for calculating R-factors(gt) etc. and is 
 not relevant to the choice of reflections for refinement.  R-factors based 
 on F^2^ are statistically about twice as large as those based on F, and R- 
 factors based on ALL data will be even larger. 
; 
 
_refine_ls_structure_factor_coef  Fsqd  
_refine_ls_matrix_type            full 
_refine_ls_weighting_scheme       calc  
_refine_ls_weighting_details 
 'calc w=1/[\s^2^(Fo^2^)+(0.0508P)^2^+0.2371P] where P=(Fo^2^+2Fc^2^)/3' 
_atom_sites_solution_primary      direct 
_atom_sites_solution_secondary    difmap 
_atom_sites_solution_hydrogens    geom 
_refine_ls_hydrogen_treatment     constr 
_refine_ls_extinction_method      none 
_refine_ls_extinction_coef        ? 
_refine_ls_number_reflns          2606 
_refine_ls_number_parameters      163 
_refine_ls_number_restraints      0 
_refine_ls_R_factor_all           0.0348 
_refine_ls_R_factor_gt            0.0324 
_refine_ls_wR_factor_ref          0.0886 
_refine_ls_wR_factor_gt           0.0869 
_refine_ls_goodness_of_fit_ref    1.033 
_refine_ls_restrained_S_all       1.033 
_refine_ls_shift/su_max           0.000 
_refine_ls_shift/su_mean          0.000 
 
loop_ 
 _atom_site_label 
 _atom_site_type_symbol 
 _atom_site_fract_x 
 _atom_site_fract_y 
 _atom_site_fract_z 
 _atom_site_U_iso_or_equiv 
 _atom_site_adp_type 
 _atom_site_occupancy 
 _atom_site_symmetry_multiplicity 
 _atom_site_calc_flag 
 _atom_site_refinement_flags 
 _atom_site_disorder_assembly 
 _atom_site_disorder_group 
C1 C -0.24237(10) 0.20733(10) 0.63008(6) 0.01476(18) Uani 1 1 d . . . 
N2 N -0.08082(9) 0.14929(9) 0.64071(6) 0.01581(16) Uani 1 1 d . . . 
H2A H -0.0353 0.1605 0.5818 0.024 Uiso 1 1 calc R . . 
H2B H -0.0825 0.0517 0.6573 0.024 Uiso 1 1 calc R . . 
H2C H -0.0269 0.2006 0.6894 0.024 Uiso 1 1 calc R . . 
C3 C -0.31667(11) 0.18794(10) 0.73031(7) 0.01872(19) Uani 1 1 d . . . 
H3A H -0.2466 0.2264 0.7850 0.022 Uiso 1 1 calc R . . 
H3B H -0.4131 0.2456 0.7297 0.022 Uiso 1 1 calc R . . 
N4 N -0.34992(10) 0.03024(10) 0.74857(6) 0.02404(19) Uani 1 1 d . . . 
N5 N -0.28354(10) -0.02533(10) 0.82324(6) 0.02277(19) Uani 1 1 d . . . 
N6 N -0.23229(13) -0.09096(12) 0.88864(7) 0.0363(2) Uani 1 1 d . . . 
C7 C -0.33572(10) 0.12008(10) 0.55017(6) 0.01720(18) Uani 1 1 d . . . 
H7A H -0.3361 0.0139 0.5683 0.021 Uiso 1 1 calc R . . 
H7B H -0.4431 0.1557 0.5460 0.021 Uiso 1 1 calc R . . 
N8 N -0.26834(10) 0.13883(9) 0.45235(6) 0.02144(18) Uani 1 1 d . . . 
N9 N -0.27788(9) 0.02959(10) 0.39703(6) 0.02023(18) Uani 1 1 d . . . 
N10 N -0.27825(12) -0.06032(12) 0.33844(7) 0.0330(2) Uani 1 1 d . . . 
C11 C -0.22480(10) 0.37138(10) 0.60430(7) 0.01737(19) Uani 1 1 d . . . 
H11A H -0.1660 0.4229 0.6593 0.021 Uiso 1 1 calc R . . 
H11B H -0.1683 0.3818 0.5428 0.021 Uiso 1 1 calc R . . 
N12 N -0.37901(10) 0.43746(9) 0.58916(7) 0.02368(19) Uani 1 1 d . . . 
N13 N -0.38140(9) 0.57376(9) 0.59789(6) 0.02052(18) Uani 1 1 d . . . 
N14 N -0.39967(11) 0.69700(10) 0.60422(8) 0.0293(2) Uani 1 1 d . . . 
N15 N 0.04535(9) 0.22063(9) 0.38267(6) 0.01703(17) Uani 1 1 d . . . 
O16 O 0.01327(9) 0.35315(8) 0.38545(6) 0.02830(18) Uani 1 1 d . . . 
O17 O 0.08530(8) 0.14860(8) 0.45955(5) 0.02268(17) Uani 1 1 d . . . 
O18 O 0.03656(9) 0.15236(8) 0.29926(5) 0.02425(17) Uani 1 1 d . . . 
 
loop_ 
 _atom_site_aniso_label 
 _atom_site_aniso_U_11 
 _atom_site_aniso_U_22 
 _atom_site_aniso_U_33 
 _atom_site_aniso_U_23 
 _atom_site_aniso_U_13 
 _atom_site_aniso_U_12 
C1 0.0172(4) 0.0126(4) 0.0144(4) -0.0001(3) 0.0007(3) 0.0012(3) 
N2 0.0189(4) 0.0135(4) 0.0149(3) -0.0010(3) -0.0001(3) 0.0017(3) 
C3 0.0244(4) 0.0158(4) 0.0163(4) 0.0006(3) 0.0046(3) 0.0007(3) 
N4 0.0317(4) 0.0207(4) 0.0197(4) 0.0042(3) 0.0005(3) -0.0049(3) 
N5 0.0291(4) 0.0195(4) 0.0202(4) 0.0012(3) 0.0060(3) -0.0021(3) 
N6 0.0514(6) 0.0285(5) 0.0283(5) 0.0094(4) -0.0024(4) -0.0006(4) 
C7 0.0198(4) 0.0166(4) 0.0152(4) -0.0003(3) 0.0007(3) -0.0022(3) 
N8 0.0299(4) 0.0196(4) 0.0148(4) -0.0005(3) 0.0006(3) -0.0051(3) 
N9 0.0218(4) 0.0228(4) 0.0160(4) 0.0021(3) 0.0000(3) -0.0014(3) 
N10 0.0452(6) 0.0296(5) 0.0243(4) -0.0062(4) 0.0038(4) -0.0010(4) 
C11 0.0188(4) 0.0128(4) 0.0205(4) 0.0010(3) 0.0003(3) 0.0007(3) 
N12 0.0218(4) 0.0138(4) 0.0349(5) 0.0015(3) -0.0022(3) 0.0027(3) 
N13 0.0201(4) 0.0187(4) 0.0227(4) 0.0020(3) 0.0007(3) 0.0026(3) 
N14 0.0294(5) 0.0183(5) 0.0400(5) -0.0007(4) 0.0008(4) 0.0051(3) 
N15 0.0167(3) 0.0150(4) 0.0195(4) 0.0004(3) 0.0018(3) -0.0012(3) 
O16 0.0351(4) 0.0124(4) 0.0371(4) -0.0010(3) 0.0002(3) 0.0009(3) 
O17 0.0270(4) 0.0240(4) 0.0169(3) 0.0028(3) -0.0002(3) 0.0043(3) 
O18 0.0348(4) 0.0214(4) 0.0164(3) -0.0015(3) -0.0003(3) 0.0053(3) 
 
_geom_special_details 
; 
 All esds (except the esd in the dihedral angle between two l.s. planes) 
 are estimated using the full covariance matrix.  The cell esds are taken 
 into account individually in the estimation of esds in distances, angles 
 and torsion angles; correlations between esds in cell parameters are only 
 used when they are defined by crystal symmetry.  An approximate (isotropic) 
 treatment of cell esds is used for estimating esds involving l.s. planes. 
; 
 
loop_ 
 _geom_bond_atom_site_label_1 
 _geom_bond_atom_site_label_2 
 _geom_bond_distance 
 _geom_bond_site_symmetry_2 
 _geom_bond_publ_flag 
C1 N2 1.5036(11) . ? 
C1 C7 1.5275(12) . ? 
C1 C11 1.5319(13) . ? 
C1 C3 1.5365(12) . ? 
N2 H2A 0.9100 . ? 
N2 H2B 0.9100 . ? 
N2 H2C 0.9100 . ? 
C3 N4 1.4776(13) . ? 
C3 H3A 0.9900 . ? 
C3 H3B 0.9900 . ? 
N4 N5 1.2344(12) . ? 
N5 N6 1.1296(13) . ? 
C7 N8 1.4786(12) . ? 
C7 H7A 0.9900 . ? 
C7 H7B 0.9900 . ? 
N8 N9 1.2348(12) . ? 
N9 N10 1.1303(13) . ? 
C11 N12 1.4758(12) . ? 
C11 H11A 0.9900 . ? 
C11 H11B 0.9900 . ? 
N12 N13 1.2375(12) . ? 
N13 N14 1.1288(13) . ? 
N15 O16 1.2308(11) . ? 
N15 O17 1.2518(10) . ? 
N15 O18 1.2762(10) . ? 
 
loop_ 
 _geom_angle_atom_site_label_1 
 _geom_angle_atom_site_label_2 
 _geom_angle_atom_site_label_3 
 _geom_angle 
 _geom_angle_site_symmetry_1 
 _geom_angle_site_symmetry_3 
 _geom_angle_publ_flag 
N2 C1 C7 110.23(7) . . ? 
N2 C1 C11 104.67(7) . . ? 
C7 C1 C11 113.41(7) . . ? 
N2 C1 C3 108.57(7) . . ? 
C7 C1 C3 108.68(7) . . ? 
C11 C1 C3 111.15(7) . . ? 
C1 N2 H2A 109.5 . . ? 
C1 N2 H2B 109.5 . . ? 
H2A N2 H2B 109.5 . . ? 
C1 N2 H2C 109.5 . . ? 
H2A N2 H2C 109.5 . . ? 
H2B N2 H2C 109.5 . . ? 
N4 C3 C1 110.61(7) . . ? 
N4 C3 H3A 109.5 . . ? 
C1 C3 H3A 109.5 . . ? 
N4 C3 H3B 109.5 . . ? 
C1 C3 H3B 109.5 . . ? 
H3A C3 H3B 108.1 . . ? 
N5 N4 C3 116.06(8) . . ? 
N6 N5 N4 171.84(11) . . ? 
N8 C7 C1 109.89(7) . . ? 
N8 C7 H7A 109.7 . . ? 
C1 C7 H7A 109.7 . . ? 
N8 C7 H7B 109.7 . . ? 
C1 C7 H7B 109.7 . . ? 
H7A C7 H7B 108.2 . . ? 
N9 N8 C7 115.17(8) . . ? 
N10 N9 N8 171.83(10) . . ? 
N12 C11 C1 108.67(7) . . ? 
N12 C11 H11A 110.0 . . ? 
C1 C11 H11A 110.0 . . ? 
N12 C11 H11B 110.0 . . ? 
C1 C11 H11B 110.0 . . ? 
H11A C11 H11B 108.3 . . ? 
N13 N12 C11 114.20(8) . . ? 
N14 N13 N12 172.82(10) . . ? 
O16 N15 O17 122.27(8) . . ? 
O16 N15 O18 119.65(8) . . ? 
O17 N15 O18 118.08(8) . . ? 
 
loop_ 
 _geom_torsion_atom_site_label_1 
 _geom_torsion_atom_site_label_2 
 _geom_torsion_atom_site_label_3 
 _geom_torsion_atom_site_label_4 
 _geom_torsion 
 _geom_torsion_site_symmetry_1 
 _geom_torsion_site_symmetry_2 
 _geom_torsion_site_symmetry_3 
 _geom_torsion_site_symmetry_4 
 _geom_torsion_publ_flag 
N2 C1 C3 N4 -72.14(9) . . . . ? 
C7 C1 C3 N4 47.76(10) . . . . ? 
C11 C1 C3 N4 173.24(7) . . . . ? 
C1 C3 N4 N5 118.38(9) . . . . ? 
C3 N4 N5 N6 177.3(7) . . . . ? 
N2 C1 C7 N8 -62.11(9) . . . . ? 
C11 C1 C7 N8 54.87(10) . . . . ? 
C3 C1 C7 N8 179.02(7) . . . . ? 
C1 C7 N8 N9 145.84(8) . . . . ? 
C7 N8 N9 N10 178.6(7) . . . . ? 
N2 C1 C11 N12 178.23(7) . . . . ? 
C7 C1 C11 N12 58.04(10) . . . . ? 
C3 C1 C11 N12 -64.75(9) . . . . ? 
C1 C11 N12 N13 159.25(8) . . . . ? 
C11 N12 N13 N14 -177.4(8) . . . . ? 
 
loop_ 
 _geom_hbond_atom_site_label_D 
 _geom_hbond_atom_site_label_H 
 _geom_hbond_atom_site_label_A 
 _geom_hbond_distance_DH 
 _geom_hbond_distance_HA 
 _geom_hbond_distance_DA 
 _geom_hbond_angle_DHA 
 _geom_hbond_site_symmetry_A 
N2 H2A O17  0.91 2.00 2.9015(11) 169.0 . 
N2 H2B O18  0.91 1.97 2.8621(12) 167.1 3_556 
N2 H2C O18  0.91 2.04 2.9212(11) 163.7 4_566 
 
_diffrn_measured_fraction_theta_max    0.995 
_diffrn_reflns_theta_full              28.30 
_diffrn_measured_fraction_theta_full   0.995 
_refine_diff_density_max    0.383 
_refine_diff_density_min   -0.301 
_refine_diff_density_rms    0.057 


#==========================================================================
 
data_compound10 
 
_audit_creation_date '2009-02-12'
_audit_creation_method  'from SHELXTL CIF, local template and enCIFer'
_chemical_name_systematic 
; 
 1,3-diazido-2-(azidomethyl)propan-2-aminium 2,4,6-trinitrophenolate 
; 
_chemical_name_common             ? 
_chemical_melting_point           ? 
_chemical_formula_moiety          
 'C4 H9 N10 +1, C6 H2 N3 O7 -1' 
_chemical_formula_sum 
 'C10 H11 N13 O7' 
_chemical_formula_weight          425.32 
 
loop_ 
 _atom_type_symbol 
 _atom_type_description 
 _atom_type_scat_dispersion_real 
 _atom_type_scat_dispersion_imag 
 _atom_type_scat_source 
 'C'  'C'   0.0033   0.0016 
 'International Tables Vol C Tables 4.2.6.8 and 6.1.1.4' 
 'H'  'H'   0.0000   0.0000 
 'International Tables Vol C Tables 4.2.6.8 and 6.1.1.4' 
 'N'  'N'   0.0061   0.0033 
 'International Tables Vol C Tables 4.2.6.8 and 6.1.1.4' 
 'O'  'O'   0.0106   0.0060 
 'International Tables Vol C Tables 4.2.6.8 and 6.1.1.4' 
 
_symmetry_cell_setting            Triclinic 
_symmetry_space_group_name_H-M    P-1 
 
loop_ 
 _symmetry_equiv_pos_as_xyz 
 'x, y, z' 
 '-x, -y, -z' 
 
_cell_length_a                    7.4766(8) 
_cell_length_b                    10.7765(11) 
_cell_length_c                    12.0355(12) 
_cell_angle_alpha                 113.0670(10) 
_cell_angle_beta                  96.2560(10) 
_cell_angle_gamma                 101.730(2) 
_cell_volume                      854.19(15) 
_cell_formula_units_Z             2 
_cell_measurement_temperature     93(2) 
_cell_measurement_reflns_used     ? 
_cell_measurement_theta_min       ? 
_cell_measurement_theta_max       ? 
 
_exptl_crystal_description        prism 
_exptl_crystal_colour             yellow 
_exptl_crystal_size_max           0.17 
_exptl_crystal_size_mid           0.08 
_exptl_crystal_size_min           0.06 
_exptl_crystal_density_meas       ? 
_exptl_crystal_density_diffrn     1.654 
_exptl_crystal_density_method     'not measured' 
_exptl_crystal_F_000              436 
_exptl_absorpt_coefficient_mu     0.141 
_exptl_absorpt_correction_type    'multi-scan'
_exptl_absorpt_process_details 
 'SADABS v2004/1 (Bruker, 2004)'
_exptl_absorpt_correction_T_min   0.790 
_exptl_absorpt_correction_T_max   1.000 
 
_exptl_special_details 
; 
 ? 
; 
 
_diffrn_ambient_temperature       93(2) 
_diffrn_radiation_wavelength      0.71073 
_diffrn_radiation_type           'MoK\a'
_diffrn_radiation_source         'fine focus sealed tube'
_diffrn_radiation_monochromator   graphite 
_diffrn_measurement_device_type  'Bruker SMART APEX II CCD'
_diffrn_measurement_method       '\w scans' 
_diffrn_detector_area_resol_mean  ? 
_diffrn_standards_number          ? 
_diffrn_standards_interval_count  ? 
_diffrn_standards_interval_time   ? 
_diffrn_standards_decay_%         ? 
_diffrn_reflns_number             9054 
_diffrn_reflns_av_R_equivalents   0.0157 
_diffrn_reflns_av_sigmaI/netI     0.0219 
_diffrn_reflns_limit_h_min        -9 
_diffrn_reflns_limit_h_max        9 
_diffrn_reflns_limit_k_min        -14 
_diffrn_reflns_limit_k_max        14 
_diffrn_reflns_limit_l_min        -16 
_diffrn_reflns_limit_l_max        15 
_diffrn_reflns_theta_min          1.88 
_diffrn_reflns_theta_max          28.34 
_reflns_number_total              4188 
_reflns_number_gt                 3686 
_reflns_threshold_expression      I>2\s(I)
 
_computing_data_collection        'Bruker APEX2 v2.1-0 (Bruker, 2006)'
_computing_cell_refinement        'Bruker APEX2 v2.1-0 (Bruker, 2006)'
_computing_data_reduction         
;
Bruker SAINT v7.34A (Bruker, 2005), Bruker XPREP v2005/2 (Bruker, 2004)
;
_computing_structure_solution     'Bruker SHELXTL v6.12 (Bruker, 2000b)' 
_computing_structure_refinement   'Bruker SHELXTL v6.12 (Bruker, 2000b)' 
_computing_molecular_graphics     'Bruker SHELXTL v6.12 (Bruker, 2000b)'
_computing_publication_material   'Bruker SHELXTL v6.12 (Bruker, 2000b)'
 
_refine_special_details 
; 
 Refinement of F^2^ against ALL reflections.  The weighted R-factor wR and 
 goodness of fit S are based on F^2^, conventional R-factors R are based 
 on F, with F set to zero for negative F^2^. The threshold expression of 
 F^2^ > 2sigma(F^2^) is used only for calculating R-factors(gt) etc. and is 
 not relevant to the choice of reflections for refinement.  R-factors based 
 on F^2^ are statistically about twice as large as those based on F, and R- 
 factors based on ALL data will be even larger. 
; 
 
_refine_ls_structure_factor_coef  Fsqd  
_refine_ls_matrix_type            full 
_refine_ls_weighting_scheme       calc  
_refine_ls_weighting_details 
 'calc w=1/[\s^2^(Fo^2^)+(0.0497P)^2^+0.2530P] where P=(Fo^2^+2Fc^2^)/3' 
_atom_sites_solution_primary      direct 
_atom_sites_solution_secondary    difmap 
_atom_sites_solution_hydrogens    geom 
_refine_ls_hydrogen_treatment     constr 
_refine_ls_extinction_method      none 
_refine_ls_extinction_coef        ? 
_refine_ls_number_reflns          4188 
_refine_ls_number_parameters      272 
_refine_ls_number_restraints      0 
_refine_ls_R_factor_all           0.0384 
_refine_ls_R_factor_gt            0.0328 
_refine_ls_wR_factor_ref          0.0900 
_refine_ls_wR_factor_gt           0.0865 
_refine_ls_goodness_of_fit_ref    1.035 
_refine_ls_restrained_S_all       1.035 
_refine_ls_shift/su_max           0.001 
_refine_ls_shift/su_mean          0.000 
 
loop_ 
 _atom_site_label 
 _atom_site_type_symbol 
 _atom_site_fract_x 
 _atom_site_fract_y 
 _atom_site_fract_z 
 _atom_site_U_iso_or_equiv 
 _atom_site_adp_type 
 _atom_site_occupancy 
 _atom_site_symmetry_multiplicity 
 _atom_site_calc_flag 
 _atom_site_refinement_flags 
 _atom_site_disorder_assembly 
 _atom_site_disorder_group 
C1 C 0.72852(14) 0.42969(11) 1.19175(9) 0.0111(2) Uani 1 1 d . . . 
N2 N 0.75415(12) 0.49301(9) 1.10155(8) 0.01089(18) Uani 1 1 d . . . 
H2A H 0.8781 0.5304 1.1096 0.016 Uiso 1 1 calc R . . 
H2B H 0.6939 0.5615 1.1170 0.016 Uiso 1 1 calc R . . 
H2C H 0.7060 0.4256 1.0233 0.016 Uiso 1 1 calc R . . 
C3 C 0.81726(15) 0.30742(11) 1.15730(10) 0.0136(2) Uani 1 1 d . . . 
H3A H 0.9518 0.3407 1.1599 0.016 Uiso 1 1 calc R . . 
H3B H 0.8046 0.2649 1.2165 0.016 Uiso 1 1 calc R . . 
N4 N 0.72018(14) 0.20315(10) 1.03143(9) 0.0178(2) Uani 1 1 d . . . 
N5 N 0.72892(14) 0.08245(10) 1.00645(9) 0.0167(2) Uani 1 1 d . . . 
N6 N 0.72493(19) -0.03185(12) 0.97247(10) 0.0300(3) Uani 1 1 d . . . 
C7 C 0.51731(14) 0.38325(12) 1.18207(10) 0.0129(2) Uani 1 1 d . . . 
H7A H 0.4650 0.4651 1.2051 0.015 Uiso 1 1 calc R . . 
H7B H 0.4545 0.3159 1.0964 0.015 Uiso 1 1 calc R . . 
N8 N 0.48775(13) 0.31644(11) 1.26771(9) 0.0175(2) Uani 1 1 d . . . 
N9 N 0.33770(15) 0.31697(13) 1.30085(10) 0.0242(2) Uani 1 1 d . . . 
N10 N 0.20473(19) 0.3109(2) 1.33721(15) 0.0487(4) Uani 1 1 d . . . 
C11 C 0.82855(15) 0.54080(11) 1.32081(10) 0.0128(2) Uani 1 1 d . . . 
H11A H 0.8051 0.5052 1.3837 0.015 Uiso 1 1 calc R . . 
H11B H 0.9649 0.5681 1.3260 0.015 Uiso 1 1 calc R . . 
N12 N 0.75041(14) 0.66093(11) 1.34009(9) 0.0179(2) Uani 1 1 d . . . 
N13 N 0.82370(13) 0.76969(10) 1.43431(8) 0.01352(19) Uani 1 1 d . . . 
N14 N 0.87460(14) 0.87639(11) 1.51520(9) 0.0197(2) Uani 1 1 d . . . 
C15 C 0.44695(14) 0.21255(11) 0.81580(9) 0.0109(2) Uani 1 1 d . . . 
C16 C 0.27331(14) 0.10754(11) 0.79030(10) 0.0118(2) Uani 1 1 d . . . 
C17 C 0.23712(15) -0.03047(11) 0.70758(10) 0.0124(2) Uani 1 1 d . . . 
H17 H 0.1208 -0.0948 0.6948 0.015 Uiso 1 1 calc R . . 
C18 C 0.37179(15) -0.07499(11) 0.64293(10) 0.0123(2) Uani 1 1 d . . . 
C19 C 0.54330(15) 0.01703(11) 0.66055(10) 0.0124(2) Uani 1 1 d . . . 
H19 H 0.6346 -0.0143 0.6157 0.015 Uiso 1 1 calc R . . 
C20 C 0.57825(14) 0.15449(11) 0.74431(10) 0.0116(2) Uani 1 1 d . . . 
O21 O 0.48054(10) 0.33965(8) 0.88877(7) 0.01278(16) Uani 1 1 d . . . 
N22 N 0.12265(13) 0.14368(10) 0.85490(9) 0.01341(19) Uani 1 1 d . . . 
O23 O 0.15024(12) 0.26010(8) 0.93996(8) 0.01835(18) Uani 1 1 d . . . 
O24 O -0.02691(12) 0.05371(10) 0.82137(9) 0.0273(2) Uani 1 1 d . . . 
N25 N 0.33126(13) -0.22083(10) 0.55503(8) 0.01358(19) Uani 1 1 d . . . 
O26 O 0.18081(11) -0.30051(8) 0.54580(8) 0.01703(17) Uani 1 1 d . . . 
O27 O 0.44815(12) -0.25746(9) 0.49377(8) 0.01959(18) Uani 1 1 d . . . 
N28 N 0.76001(12) 0.24543(10) 0.75620(8) 0.01208(18) Uani 1 1 d . . . 
O29 O 0.84535(12) 0.20520(9) 0.67300(8) 0.01990(18) Uani 1 1 d . . . 
O30 O 0.82389(11) 0.35862(9) 0.84849(7) 0.01725(17) Uani 1 1 d . . . 
 
loop_ 
 _atom_site_aniso_label 
 _atom_site_aniso_U_11 
 _atom_site_aniso_U_22 
 _atom_site_aniso_U_33 
 _atom_site_aniso_U_23 
 _atom_site_aniso_U_13 
 _atom_site_aniso_U_12 
C1 0.0107(5) 0.0109(5) 0.0119(5) 0.0058(4) 0.0019(4) 0.0016(4) 
N2 0.0106(4) 0.0103(4) 0.0116(4) 0.0047(3) 0.0027(3) 0.0022(3) 
C3 0.0134(5) 0.0121(5) 0.0145(5) 0.0053(4) 0.0008(4) 0.0035(4) 
N4 0.0234(5) 0.0130(5) 0.0153(5) 0.0036(4) 0.0011(4) 0.0080(4) 
N5 0.0195(5) 0.0150(5) 0.0148(4) 0.0066(4) 0.0040(4) 0.0022(4) 
N6 0.0514(8) 0.0138(5) 0.0229(5) 0.0076(4) 0.0057(5) 0.0061(5) 
C7 0.0107(5) 0.0148(5) 0.0146(5) 0.0084(4) 0.0026(4) 0.0019(4) 
N8 0.0128(4) 0.0230(5) 0.0212(5) 0.0144(4) 0.0051(4) 0.0035(4) 
N9 0.0167(5) 0.0381(7) 0.0301(6) 0.0266(5) 0.0066(4) 0.0076(5) 
N10 0.0267(7) 0.0939(13) 0.0690(10) 0.0682(10) 0.0275(7) 0.0286(7) 
C11 0.0123(5) 0.0116(5) 0.0126(5) 0.0044(4) 0.0006(4) 0.0019(4) 
N12 0.0189(5) 0.0148(5) 0.0138(4) 0.0003(4) -0.0019(4) 0.0061(4) 
N13 0.0130(4) 0.0148(5) 0.0137(4) 0.0064(4) 0.0035(3) 0.0046(4) 
N14 0.0179(5) 0.0168(5) 0.0189(5) 0.0027(4) 0.0017(4) 0.0047(4) 
C15 0.0110(5) 0.0122(5) 0.0103(4) 0.0060(4) 0.0012(4) 0.0031(4) 
C16 0.0102(5) 0.0139(5) 0.0127(5) 0.0066(4) 0.0032(4) 0.0039(4) 
C17 0.0103(5) 0.0134(5) 0.0134(5) 0.0070(4) 0.0007(4) 0.0010(4) 
C18 0.0137(5) 0.0102(5) 0.0117(5) 0.0041(4) 0.0012(4) 0.0023(4) 
C19 0.0120(5) 0.0133(5) 0.0128(5) 0.0061(4) 0.0037(4) 0.0036(4) 
C20 0.0090(5) 0.0124(5) 0.0134(5) 0.0065(4) 0.0026(4) 0.0011(4) 
O21 0.0115(4) 0.0116(4) 0.0134(4) 0.0037(3) 0.0015(3) 0.0032(3) 
N22 0.0112(4) 0.0148(4) 0.0159(4) 0.0078(4) 0.0041(3) 0.0037(3) 
O23 0.0190(4) 0.0132(4) 0.0227(4) 0.0056(3) 0.0096(3) 0.0055(3) 
O24 0.0130(4) 0.0257(5) 0.0308(5) 0.0021(4) 0.0092(3) -0.0027(4) 
N25 0.0140(4) 0.0116(4) 0.0132(4) 0.0044(3) 0.0012(3) 0.0020(3) 
O26 0.0141(4) 0.0128(4) 0.0197(4) 0.0055(3) 0.0005(3) -0.0011(3) 
O27 0.0181(4) 0.0161(4) 0.0207(4) 0.0030(3) 0.0074(3) 0.0047(3) 
N28 0.0114(4) 0.0108(4) 0.0142(4) 0.0057(3) 0.0033(3) 0.0022(3) 
O29 0.0188(4) 0.0173(4) 0.0216(4) 0.0054(3) 0.0121(3) 0.0026(3) 
O30 0.0132(4) 0.0148(4) 0.0169(4) 0.0021(3) 0.0030(3) -0.0009(3) 
 
_geom_special_details 
; 
 All esds (except the esd in the dihedral angle between two l.s. planes) 
 are estimated using the full covariance matrix.  The cell esds are taken 
 into account individually in the estimation of esds in distances, angles 
 and torsion angles; correlations between esds in cell parameters are only 
 used when they are defined by crystal symmetry.  An approximate (isotropic) 
 treatment of cell esds is used for estimating esds involving l.s. planes. 
; 
 
loop_ 
 _geom_bond_atom_site_label_1 
 _geom_bond_atom_site_label_2 
 _geom_bond_distance 
 _geom_bond_site_symmetry_2 
 _geom_bond_publ_flag 
C1 N2 1.5012(13) . ? 
C1 C11 1.5268(14) . ? 
C1 C3 1.5283(14) . ? 
C1 C7 1.5332(14) . ? 
N2 H2A 0.9100 . ? 
N2 H2B 0.9100 . ? 
N2 H2C 0.9100 . ? 
C3 N4 1.4762(14) . ? 
C3 H3A 0.9900 . ? 
C3 H3B 0.9900 . ? 
N4 N5 1.2325(14) . ? 
N5 N6 1.1283(15) . ? 
C7 N8 1.4819(14) . ? 
C7 H7A 0.9900 . ? 
C7 H7B 0.9900 . ? 
N8 N9 1.2313(14) . ? 
N9 N10 1.1292(16) . ? 
C11 N12 1.4741(14) . ? 
C11 H11A 0.9900 . ? 
C11 H11B 0.9900 . ? 
N12 N13 1.2336(14) . ? 
N13 N14 1.1309(14) . ? 
C15 O21 1.2569(13) . ? 
C15 C16 1.4505(15) . ? 
C15 C20 1.4518(14) . ? 
C16 C17 1.3762(15) . ? 
C16 N22 1.4686(13) . ? 
C17 C18 1.3870(15) . ? 
C17 H17 0.9500 . ? 
C18 C19 1.3898(15) . ? 
C18 N25 1.4542(14) . ? 
C19 C20 1.3762(15) . ? 
C19 H19 0.9500 . ? 
C20 N28 1.4608(13) . ? 
N22 O23 1.2275(12) . ? 
N22 O24 1.2279(13) . ? 
N25 O27 1.2312(12) . ? 
N25 O26 1.2329(12) . ? 
N28 O29 1.2285(12) . ? 
N28 O30 1.2392(12) . ? 
 
loop_ 
 _geom_angle_atom_site_label_1 
 _geom_angle_atom_site_label_2 
 _geom_angle_atom_site_label_3 
 _geom_angle 
 _geom_angle_site_symmetry_1 
 _geom_angle_site_symmetry_3 
 _geom_angle_publ_flag 
N2 C1 C11 108.48(8) . . ? 
N2 C1 C3 108.43(8) . . ? 
C11 C1 C3 109.24(8) . . ? 
N2 C1 C7 106.28(8) . . ? 
C11 C1 C7 111.67(9) . . ? 
C3 C1 C7 112.58(9) . . ? 
C1 N2 H2A 109.5 . . ? 
C1 N2 H2B 109.5 . . ? 
H2A N2 H2B 109.5 . . ? 
C1 N2 H2C 109.5 . . ? 
H2A N2 H2C 109.5 . . ? 
H2B N2 H2C 109.5 . . ? 
N4 C3 C1 107.98(8) . . ? 
N4 C3 H3A 110.1 . . ? 
C1 C3 H3A 110.1 . . ? 
N4 C3 H3B 110.1 . . ? 
C1 C3 H3B 110.1 . . ? 
H3A C3 H3B 108.4 . . ? 
N5 N4 C3 115.22(9) . . ? 
N6 N5 N4 172.96(12) . . ? 
N8 C7 C1 107.40(8) . . ? 
N8 C7 H7A 110.2 . . ? 
C1 C7 H7A 110.2 . . ? 
N8 C7 H7B 110.2 . . ? 
C1 C7 H7B 110.2 . . ? 
H7A C7 H7B 108.5 . . ? 
N9 N8 C7 113.81(9) . . ? 
N10 N9 N8 173.63(13) . . ? 
N12 C11 C1 105.52(8) . . ? 
N12 C11 H11A 110.6 . . ? 
C1 C11 H11A 110.6 . . ? 
N12 C11 H11B 110.6 . . ? 
C1 C11 H11B 110.6 . . ? 
H11A C11 H11B 108.8 . . ? 
N13 N12 C11 117.23(9) . . ? 
N14 N13 N12 171.11(11) . . ? 
O21 C15 C16 124.76(9) . . ? 
O21 C15 C20 123.27(10) . . ? 
C16 C15 C20 111.96(9) . . ? 
C17 C16 C15 123.95(9) . . ? 
C17 C16 N22 115.25(9) . . ? 
C15 C16 N22 120.79(9) . . ? 
C16 C17 C18 119.49(10) . . ? 
C16 C17 H17 120.3 . . ? 
C18 C17 H17 120.3 . . ? 
C17 C18 C19 121.25(10) . . ? 
C17 C18 N25 118.96(10) . . ? 
C19 C18 N25 119.79(9) . . ? 
C20 C19 C18 118.66(10) . . ? 
C20 C19 H19 120.7 . . ? 
C18 C19 H19 120.7 . . ? 
C19 C20 C15 124.69(10) . . ? 
C19 C20 N28 115.53(9) . . ? 
C15 C20 N28 119.76(9) . . ? 
O23 N22 O24 122.65(9) . . ? 
O23 N22 C16 119.69(9) . . ? 
O24 N22 C16 117.65(9) . . ? 
O27 N25 O26 123.82(9) . . ? 
O27 N25 C18 118.32(9) . . ? 
O26 N25 C18 117.86(9) . . ? 
O29 N28 O30 122.16(9) . . ? 
O29 N28 C20 117.86(9) . . ? 
O30 N28 C20 119.98(9) . . ? 
 
loop_ 
 _geom_torsion_atom_site_label_1 
 _geom_torsion_atom_site_label_2 
 _geom_torsion_atom_site_label_3 
 _geom_torsion_atom_site_label_4 
 _geom_torsion 
 _geom_torsion_site_symmetry_1 
 _geom_torsion_site_symmetry_2 
 _geom_torsion_site_symmetry_3 
 _geom_torsion_site_symmetry_4 
 _geom_torsion_publ_flag 
N2 C1 C3 N4 -60.91(11) . . . . ? 
C11 C1 C3 N4 -178.95(9) . . . . ? 
C7 C1 C3 N4 56.39(11) . . . . ? 
C1 C3 N4 N5 -156.41(10) . . . . ? 
C3 N4 N5 N6 174.9(10) . . . . ? 
N2 C1 C7 N8 178.37(8) . . . . ? 
C11 C1 C7 N8 -63.51(11) . . . . ? 
C3 C1 C7 N8 59.81(11) . . . . ? 
C1 C7 N8 N9 156.81(10) . . . . ? 
C7 N8 N9 N10 178.3(15) . . . . ? 
N2 C1 C11 N12 55.26(10) . . . . ? 
C3 C1 C11 N12 173.26(9) . . . . ? 
C7 C1 C11 N12 -61.54(11) . . . . ? 
C1 C11 N12 N13 -173.07(10) . . . . ? 
C11 N12 N13 N14 179(100) . . . . ? 
O21 C15 C16 C17 178.18(10) . . . . ? 
C20 C15 C16 C17 -0.38(14) . . . . ? 
O21 C15 C16 N22 -2.71(15) . . . . ? 
C20 C15 C16 N22 178.72(9) . . . . ? 
C15 C16 C17 C18 -0.23(16) . . . . ? 
N22 C16 C17 C18 -179.38(9) . . . . ? 
C16 C17 C18 C19 0.35(16) . . . . ? 
C16 C17 C18 N25 -179.49(9) . . . . ? 
C17 C18 C19 C20 0.19(16) . . . . ? 
N25 C18 C19 C20 -179.97(9) . . . . ? 
C18 C19 C20 C15 -0.89(16) . . . . ? 
C18 C19 C20 N28 -178.94(9) . . . . ? 
O21 C15 C20 C19 -177.63(10) . . . . ? 
C16 C15 C20 C19 0.95(14) . . . . ? 
O21 C15 C20 N28 0.34(15) . . . . ? 
C16 C15 C20 N28 178.93(9) . . . . ? 
C17 C16 N22 O23 171.93(9) . . . . ? 
C15 C16 N22 O23 -7.25(14) . . . . ? 
C17 C16 N22 O24 -7.29(14) . . . . ? 
C15 C16 N22 O24 173.53(10) . . . . ? 
C17 C18 N25 O27 176.43(9) . . . . ? 
C19 C18 N25 O27 -3.41(15) . . . . ? 
C17 C18 N25 O26 -3.17(14) . . . . ? 
C19 C18 N25 O26 176.99(9) . . . . ? 
C19 C20 N28 O29 17.87(14) . . . . ? 
C15 C20 N28 O29 -160.29(10) . . . . ? 
C19 C20 N28 O30 -161.62(10) . . . . ? 
C15 C20 N28 O30 20.22(14) . . . . ? 
 
loop_ 
 _geom_hbond_atom_site_label_D 
 _geom_hbond_atom_site_label_H 
 _geom_hbond_atom_site_label_A 
 _geom_hbond_distance_DH 
 _geom_hbond_distance_HA 
 _geom_hbond_distance_DA 
 _geom_hbond_angle_DHA 
 _geom_hbond_site_symmetry_A 
N2 H2A O30  0.91 2.20 3.1070(12) 172.8 2_767 
N2 H2B O21  0.91 1.86 2.7406(12) 163.5 2_667 
N2 H2C O21  0.91 1.98 2.7643(12) 143.5 . 
 
_diffrn_measured_fraction_theta_max    0.986 
_diffrn_reflns_theta_full              28.34 
_diffrn_measured_fraction_theta_full   0.986 
_refine_diff_density_max    0.397 
_refine_diff_density_min   -0.304 
_refine_diff_density_rms    0.050 


#==========================================================================

data_compound15 
 
_audit_creation_date '2009-01-22'
_audit_creation_method  'from SHELXTL CIF, local template and enCIFer'
_chemical_name_systematic 
; 
 bi(1,3-diazido-2-(azidomethyl)propan-2-aminium) 
((5Z,5'Z)-4,4'-(ethane-1,2-diyl)bis(5-(nitroimino)-4,5-dihydrotetrazol-1-ide)) 
; 
_chemical_name_common             ? 
_chemical_melting_point           ? 
_chemical_formula_moiety          
 'C4 H9 N10 +1, 0.5(C4 H4 N12 O4 -2)'  
_chemical_formula_sum 
 'C6 H11 N16 O2' 
_chemical_formula_weight          339.31 
 
loop_ 
 _atom_type_symbol 
 _atom_type_description 
 _atom_type_scat_dispersion_real 
 _atom_type_scat_dispersion_imag 
 _atom_type_scat_source 
 'C'  'C'   0.0033   0.0016 
 'International Tables Vol C Tables 4.2.6.8 and 6.1.1.4' 
 'H'  'H'   0.0000   0.0000 
 'International Tables Vol C Tables 4.2.6.8 and 6.1.1.4' 
 'N'  'N'   0.0061   0.0033 
 'International Tables Vol C Tables 4.2.6.8 and 6.1.1.4' 
 'O'  'O'   0.0106   0.0060 
 'International Tables Vol C Tables 4.2.6.8 and 6.1.1.4' 
 
_symmetry_cell_setting            Monoclinic 
_symmetry_space_group_name_H-M    P2(1)/c 
 
loop_ 
 _symmetry_equiv_pos_as_xyz 
 'x, y, z' 
 '-x, y+1/2, -z+1/2' 
 '-x, -y, -z' 
 'x, -y-1/2, z-1/2' 
 
_cell_length_a                    7.7636(7) 
_cell_length_b                    25.836(2) 
_cell_length_c                    8.0569(7) 
_cell_angle_alpha                 90.00 
_cell_angle_beta                  118.4650(10) 
_cell_angle_gamma                 90.00 
_cell_volume                      1420.7(2) 
_cell_formula_units_Z             4 
_cell_measurement_temperature     173(2) 
_cell_measurement_reflns_used     ? 
_cell_measurement_theta_min       ? 
_cell_measurement_theta_max       ? 
 
_exptl_crystal_description        'thick plate' 
_exptl_crystal_colour             colorless 
_exptl_crystal_size_max           0.69 
_exptl_crystal_size_mid           0.52 
_exptl_crystal_size_min           0.06 
_exptl_crystal_density_meas       ? 
_exptl_crystal_density_diffrn     1.586 
_exptl_crystal_density_method     'not measured' 
_exptl_crystal_F_000              700 
_exptl_absorpt_coefficient_mu     0.128 
_exptl_absorpt_correction_type    'multi-scan'
_exptl_absorpt_process_details 
 'SADABS v2004/1 (Bruker, 2004)'
_exptl_absorpt_correction_T_min   0.812
_exptl_absorpt_correction_T_max   1.000 
 
_exptl_special_details 
; 
 ? 
; 
 
_diffrn_ambient_temperature       173(2) 
_diffrn_radiation_wavelength      0.71073 
_diffrn_radiation_type           'MoK\a'
_diffrn_radiation_source         'fine focus sealed tube'
_diffrn_radiation_monochromator   graphite 
_diffrn_measurement_device_type  'Bruker SMART APEX II CCD'
_diffrn_measurement_method       '\w scans' 
_diffrn_detector_area_resol_mean  ? 
_diffrn_standards_number          ? 
_diffrn_standards_interval_count  ? 
_diffrn_standards_interval_time   ? 
_diffrn_standards_decay_%         ? 
_diffrn_reflns_number             14840 
_diffrn_reflns_av_R_equivalents   0.0212 
_diffrn_reflns_av_sigmaI/netI     0.0180 
_diffrn_reflns_limit_h_min        -10 
_diffrn_reflns_limit_h_max        10 
_diffrn_reflns_limit_k_min        -34 
_diffrn_reflns_limit_k_max        34 
_diffrn_reflns_limit_l_min        -10 
_diffrn_reflns_limit_l_max        10 
_diffrn_reflns_theta_min          1.58 
_diffrn_reflns_theta_max          28.31 
_reflns_number_total              3519 
_reflns_number_gt                 3075 
_reflns_threshold_expression      I>2\s(I)
 
_computing_data_collection        'Bruker APEX2 v2.1-0 (Bruker, 2006)'
_computing_cell_refinement        'Bruker APEX2 v2.1-0 (Bruker, 2006)'
_computing_data_reduction         
;
Bruker SAINT v7.34A (Bruker, 2005), Bruker XPREP v2005/2 (Bruker, 2004)
;
_computing_structure_solution     'Bruker SHELXTL v6.12 (Bruker, 2000b)' 
_computing_structure_refinement   'Bruker SHELXTL v6.12 (Bruker, 2000b)' 
_computing_molecular_graphics     'Bruker SHELXTL v6.12 (Bruker, 2000b)'
_computing_publication_material   'Bruker SHELXTL v6.12 (Bruker, 2000b)'
 
_refine_special_details 
; 
 Refinement of F^2^ against ALL reflections.  The weighted R-factor wR and 
 goodness of fit S are based on F^2^, conventional R-factors R are based 
 on F, with F set to zero for negative F^2^. The threshold expression of 
 F^2^ > 2sigma(F^2^) is used only for calculating R-factors(gt) etc. and is 
 not relevant to the choice of reflections for refinement.  R-factors based 
 on F^2^ are statistically about twice as large as those based on F, and R- 
 factors based on ALL data will be even larger. 
; 
 
_refine_ls_structure_factor_coef  Fsqd  
_refine_ls_matrix_type            full 
_refine_ls_weighting_scheme       calc  
_refine_ls_weighting_details 
 'calc w=1/[\s^2^(Fo^2^)+(0.0464P)^2^+0.4737P] where P=(Fo^2^+2Fc^2^)/3' 
_atom_sites_solution_primary      direct 
_atom_sites_solution_secondary    difmap 
_atom_sites_solution_hydrogens    geom 
_refine_ls_hydrogen_treatment     constr 
_refine_ls_extinction_method      none 
_refine_ls_extinction_coef        ? 
_refine_ls_number_reflns          3519 
_refine_ls_number_parameters      217 
_refine_ls_number_restraints      0 
_refine_ls_R_factor_all           0.0421 
_refine_ls_R_factor_gt            0.0361 
_refine_ls_wR_factor_ref          0.0945 
_refine_ls_wR_factor_gt           0.0895 
_refine_ls_goodness_of_fit_ref    1.027 
_refine_ls_restrained_S_all       1.027 
_refine_ls_shift/su_max           0.000 
_refine_ls_shift/su_mean          0.000 
 
loop_ 
 _atom_site_label 
 _atom_site_type_symbol 
 _atom_site_fract_x 
 _atom_site_fract_y 
 _atom_site_fract_z 
 _atom_site_U_iso_or_equiv 
 _atom_site_adp_type 
 _atom_site_occupancy 
 _atom_site_symmetry_multiplicity 
 _atom_site_calc_flag 
 _atom_site_refinement_flags 
 _atom_site_disorder_assembly 
 _atom_site_disorder_group 
N1 N 0.02022(14) -0.01581(4) 0.28564(13) 0.0194(2) Uani 1 1 d . . . 
N2 N -0.07946(15) -0.05829(4) 0.19138(15) 0.0257(2) Uani 1 1 d . . . 
N3 N 0.01299(16) -0.07683(4) 0.10706(15) 0.0281(2) Uani 1 1 d . . . 
N4 N 0.17296(15) -0.04729(4) 0.14351(14) 0.0231(2) Uani 1 1 d . . . 
C5 C 0.17738(16) -0.00940(4) 0.25796(15) 0.0182(2) Uani 1 1 d . . . 
N6 N 0.30043(14) 0.03048(4) 0.35318(14) 0.0216(2) Uani 1 1 d . . . 
N7 N 0.44002(14) 0.04110(4) 0.30948(14) 0.0222(2) Uani 1 1 d . . . 
O8 O 0.55500(14) 0.07678(3) 0.40021(15) 0.0337(2) Uani 1 1 d . . . 
O9 O 0.45941(13) 0.01751(3) 0.18207(13) 0.0276(2) Uani 1 1 d . . . 
C10 C -0.03804(17) 0.01344(4) 0.40498(16) 0.0209(2) Uani 1 1 d . . . 
H10A H -0.1827 0.0159 0.3433 0.025 Uiso 1 1 calc R . . 
H10B H 0.0160 0.0489 0.4235 0.025 Uiso 1 1 calc R . . 
C11 C 0.54169(16) 0.14216(4) 0.94025(15) 0.0187(2) Uani 1 1 d . . . 
N12 N 0.54068(14) 0.08417(4) 0.93990(14) 0.0214(2) Uani 1 1 d . . . 
H12A H 0.4199 0.0726 0.8544 0.032 Uiso 1 1 calc R . . 
H12B H 0.5701 0.0724 1.0569 0.032 Uiso 1 1 calc R . . 
H12C H 0.6314 0.0723 0.9081 0.032 Uiso 1 1 calc R . . 
C13 C 0.37915(17) 0.15728(4) 0.98652(17) 0.0220(2) Uani 1 1 d . . . 
H13A H 0.2528 0.1427 0.8905 0.026 Uiso 1 1 calc R . . 
H13B H 0.4082 0.1430 1.1112 0.026 Uiso 1 1 calc R . . 
N14 N 0.36444(17) 0.21430(4) 0.98937(19) 0.0340(3) Uani 1 1 d . . . 
N15 N 0.20047(18) 0.22877(4) 0.95870(19) 0.0358(3) Uani 1 1 d . . . 
N16 N 0.0570(2) 0.24619(6) 0.9326(3) 0.0627(5) Uani 1 1 d . . . 
C17 C 0.74480(17) 0.16198(5) 1.08408(16) 0.0234(2) Uani 1 1 d . . . 
H17A H 0.8399 0.1535 1.0391 0.028 Uiso 1 1 calc R . . 
H17B H 0.7401 0.2001 1.0929 0.028 Uiso 1 1 calc R . . 
N18 N 0.81308(16) 0.13942(4) 1.27325(15) 0.0300(2) Uani 1 1 d . . . 
N19 N 0.77546(19) 0.16501(5) 1.38175(17) 0.0385(3) Uani 1 1 d . . . 
N20 N 0.7512(3) 0.18443(7) 1.4940(2) 0.0706(6) Uani 1 1 d . . . 
C21 C 0.50388(18) 0.16044(5) 0.74593(17) 0.0248(2) Uani 1 1 d . . . 
H21A H 0.5070 0.1987 0.7424 0.030 Uiso 1 1 calc R . . 
H21B H 0.6061 0.1468 0.7176 0.030 Uiso 1 1 calc R . . 
N22 N 0.30911(16) 0.14121(5) 0.60544(15) 0.0299(2) Uani 1 1 d . . . 
N23 N 0.27034(15) 0.15055(4) 0.44071(14) 0.0252(2) Uani 1 1 d . . . 
N24 N 0.21888(17) 0.15784(5) 0.28675(15) 0.0341(3) Uani 1 1 d . . . 
 
loop_ 
 _atom_site_aniso_label 
 _atom_site_aniso_U_11 
 _atom_site_aniso_U_22 
 _atom_site_aniso_U_33 
 _atom_site_aniso_U_23 
 _atom_site_aniso_U_13 
 _atom_site_aniso_U_12 
N1 0.0174(4) 0.0227(4) 0.0215(5) -0.0021(4) 0.0121(4) -0.0023(3) 
N2 0.0230(5) 0.0297(5) 0.0271(5) -0.0069(4) 0.0142(4) -0.0079(4) 
N3 0.0270(5) 0.0318(5) 0.0304(5) -0.0096(4) 0.0175(5) -0.0086(4) 
N4 0.0228(5) 0.0259(5) 0.0250(5) -0.0047(4) 0.0150(4) -0.0036(4) 
C5 0.0166(5) 0.0208(5) 0.0199(5) 0.0019(4) 0.0109(4) 0.0017(4) 
N6 0.0198(5) 0.0209(4) 0.0285(5) -0.0019(4) 0.0151(4) -0.0020(4) 
N7 0.0185(5) 0.0198(4) 0.0308(5) 0.0057(4) 0.0138(4) 0.0020(4) 
O8 0.0253(5) 0.0234(4) 0.0535(6) -0.0020(4) 0.0196(4) -0.0077(3) 
O9 0.0259(4) 0.0328(4) 0.0331(5) 0.0029(4) 0.0214(4) 0.0008(3) 
C10 0.0209(5) 0.0230(5) 0.0249(6) 0.0008(4) 0.0159(5) 0.0036(4) 
C11 0.0182(5) 0.0187(5) 0.0220(5) 0.0015(4) 0.0118(4) 0.0001(4) 
N12 0.0211(5) 0.0207(4) 0.0265(5) 0.0008(4) 0.0146(4) 0.0019(4) 
C13 0.0219(6) 0.0186(5) 0.0308(6) -0.0013(4) 0.0170(5) 0.0004(4) 
N14 0.0295(6) 0.0208(5) 0.0571(8) -0.0059(5) 0.0250(6) -0.0003(4) 
N15 0.0386(7) 0.0213(5) 0.0559(8) 0.0031(5) 0.0292(6) 0.0052(5) 
N16 0.0545(9) 0.0367(7) 0.1154(15) 0.0179(8) 0.0555(10) 0.0209(7) 
C17 0.0201(5) 0.0291(6) 0.0224(5) 0.0011(4) 0.0114(5) -0.0034(4) 
N18 0.0272(5) 0.0400(6) 0.0221(5) 0.0015(4) 0.0112(4) -0.0030(5) 
N19 0.0447(7) 0.0464(7) 0.0317(6) -0.0105(5) 0.0243(6) -0.0251(6) 
N20 0.1069(14) 0.0753(11) 0.0622(10) -0.0377(9) 0.0668(11) -0.0546(10) 
C21 0.0217(6) 0.0304(6) 0.0228(5) 0.0041(5) 0.0110(5) -0.0026(5) 
N22 0.0256(5) 0.0414(6) 0.0220(5) 0.0022(4) 0.0107(4) -0.0060(5) 
N23 0.0210(5) 0.0305(5) 0.0251(5) -0.0009(4) 0.0117(4) 0.0018(4) 
N24 0.0272(6) 0.0517(7) 0.0234(5) 0.0004(5) 0.0122(5) 0.0040(5) 
 
_geom_special_details 
; 
 All esds (except the esd in the dihedral angle between two l.s. planes) 
 are estimated using the full covariance matrix.  The cell esds are taken 
 into account individually in the estimation of esds in distances, angles 
 and torsion angles; correlations between esds in cell parameters are only 
 used when they are defined by crystal symmetry.  An approximate (isotropic) 
 treatment of cell esds is used for estimating esds involving l.s. planes. 
; 
 
loop_ 
 _geom_bond_atom_site_label_1 
 _geom_bond_atom_site_label_2 
 _geom_bond_distance 
 _geom_bond_site_symmetry_2 
 _geom_bond_publ_flag 
N1 N2 1.3491(13) . ? 
N1 C5 1.3510(13) . ? 
N1 C10 1.4541(13) . ? 
N2 N3 1.2926(14) . ? 
N3 N4 1.3650(14) . ? 
N4 C5 1.3339(14) . ? 
C5 N6 1.3655(14) . ? 
N6 N7 1.3181(13) . ? 
N7 O8 1.2486(13) . ? 
N7 O9 1.2630(13) . ? 
C10 C10 1.521(2) 3_556 ? 
C10 H10A 0.9900 . ? 
C10 H10B 0.9900 . ? 
C11 N12 1.4985(14) . ? 
C11 C21 1.5239(15) . ? 
C11 C13 1.5272(14) . ? 
C11 C17 1.5329(16) . ? 
N12 H12A 0.9100 . ? 
N12 H12B 0.9100 . ? 
N12 H12C 0.9100 . ? 
C13 N14 1.4785(14) . ? 
C13 H13A 0.9900 . ? 
C13 H13B 0.9900 . ? 
N14 N15 1.2335(16) . ? 
N15 N16 1.1245(18) . ? 
C17 N18 1.4744(15) . ? 
C17 H17A 0.9900 . ? 
C17 H17B 0.9900 . ? 
N18 N19 1.2370(16) . ? 
N19 N20 1.1261(18) . ? 
C21 N22 1.4774(16) . ? 
C21 H21A 0.9900 . ? 
C21 H21B 0.9900 . ? 
N22 N23 1.2367(14) . ? 
N23 N24 1.1231(15) . ? 
 
loop_ 
 _geom_angle_atom_site_label_1 
 _geom_angle_atom_site_label_2 
 _geom_angle_atom_site_label_3 
 _geom_angle 
 _geom_angle_site_symmetry_1 
 _geom_angle_site_symmetry_3 
 _geom_angle_publ_flag 
N2 N1 C5 109.12(9) . . ? 
N2 N1 C10 121.28(9) . . ? 
C5 N1 C10 129.46(9) . . ? 
N3 N2 N1 106.50(9) . . ? 
N2 N3 N4 110.85(9) . . ? 
C5 N4 N3 106.26(9) . . ? 
N4 C5 N1 107.25(9) . . ? 
N4 C5 N6 136.29(10) . . ? 
N1 C5 N6 116.41(9) . . ? 
N7 N6 C5 116.81(9) . . ? 
O8 N7 O9 120.21(9) . . ? 
O8 N7 N6 116.53(10) . . ? 
O9 N7 N6 123.25(10) . . ? 
N1 C10 C10 109.54(11) . 3_556 ? 
N1 C10 H10A 109.8 . . ? 
C10 C10 H10A 109.8 3_556 . ? 
N1 C10 H10B 109.8 . . ? 
C10 C10 H10B 109.8 3_556 . ? 
H10A C10 H10B 108.2 . . ? 
N12 C11 C21 108.04(9) . . ? 
N12 C11 C13 104.60(8) . . ? 
C21 C11 C13 113.24(10) . . ? 
N12 C11 C17 109.76(9) . . ? 
C21 C11 C17 107.35(9) . . ? 
C13 C11 C17 113.70(9) . . ? 
C11 N12 H12A 109.5 . . ? 
C11 N12 H12B 109.5 . . ? 
H12A N12 H12B 109.5 . . ? 
C11 N12 H12C 109.5 . . ? 
H12A N12 H12C 109.5 . . ? 
H12B N12 H12C 109.5 . . ? 
N14 C13 C11 109.73(9) . . ? 
N14 C13 H13A 109.7 . . ? 
C11 C13 H13A 109.7 . . ? 
N14 C13 H13B 109.7 . . ? 
C11 C13 H13B 109.7 . . ? 
H13A C13 H13B 108.2 . . ? 
N15 N14 C13 112.26(10) . . ? 
N16 N15 N14 174.04(14) . . ? 
N18 C17 C11 112.51(9) . . ? 
N18 C17 H17A 109.1 . . ? 
C11 C17 H17A 109.1 . . ? 
N18 C17 H17B 109.1 . . ? 
C11 C17 H17B 109.1 . . ? 
H17A C17 H17B 107.8 . . ? 
N19 N18 C17 115.44(12) . . ? 
N20 N19 N18 172.83(18) . . ? 
N22 C21 C11 107.97(9) . . ? 
N22 C21 H21A 110.1 . . ? 
C11 C21 H21A 110.1 . . ? 
N22 C21 H21B 110.1 . . ? 
C11 C21 H21B 110.1 . . ? 
H21A C21 H21B 108.4 . . ? 
N23 N22 C21 113.16(10) . . ? 
N24 N23 N22 173.99(13) . . ? 
 
loop_ 
 _geom_torsion_atom_site_label_1 
 _geom_torsion_atom_site_label_2 
 _geom_torsion_atom_site_label_3 
 _geom_torsion_atom_site_label_4 
 _geom_torsion 
 _geom_torsion_site_symmetry_1 
 _geom_torsion_site_symmetry_2 
 _geom_torsion_site_symmetry_3 
 _geom_torsion_site_symmetry_4 
 _geom_torsion_publ_flag 
C5 N1 N2 N3 -0.72(13) . . . . ? 
C10 N1 N2 N3 -176.80(10) . . . . ? 
N1 N2 N3 N4 -0.06(14) . . . . ? 
N2 N3 N4 C5 0.82(14) . . . . ? 
N3 N4 C5 N1 -1.22(12) . . . . ? 
N3 N4 C5 N6 175.71(13) . . . . ? 
N2 N1 C5 N4 1.23(12) . . . . ? 
C10 N1 C5 N4 176.89(10) . . . . ? 
N2 N1 C5 N6 -176.40(10) . . . . ? 
C10 N1 C5 N6 -0.74(17) . . . . ? 
N4 C5 N6 N7 11.48(19) . . . . ? 
N1 C5 N6 N7 -171.79(9) . . . . ? 
C5 N6 N7 O8 -178.31(10) . . . . ? 
C5 N6 N7 O9 2.36(16) . . . . ? 
N2 N1 C10 C10 80.35(15) . . . 3_556 ? 
C5 N1 C10 C10 -94.85(15) . . . 3_556 ? 
N12 C11 C13 N14 -179.52(10) . . . . ? 
C21 C11 C13 N14 -62.13(13) . . . . ? 
C17 C11 C13 N14 60.76(13) . . . . ? 
C11 C13 N14 N15 155.81(12) . . . . ? 
C13 N14 N15 N16 179(100) . . . . ? 
N12 C11 C17 N18 -52.94(12) . . . . ? 
C21 C11 C17 N18 -170.13(10) . . . . ? 
C13 C11 C17 N18 63.81(13) . . . . ? 
C11 C17 N18 N19 -93.03(13) . . . . ? 
C17 N18 N19 N20 -178(72) . . . . ? 
N12 C11 C21 N22 61.21(12) . . . . ? 
C13 C11 C21 N22 -54.15(13) . . . . ? 
C17 C11 C21 N22 179.51(9) . . . . ? 
C11 C21 N22 N23 -174.71(10) . . . . ? 
C21 N22 N23 N24 -167.6(12) . . . . ? 
 
loop_ 
 _geom_hbond_atom_site_label_D 
 _geom_hbond_atom_site_label_H 
 _geom_hbond_atom_site_label_A 
 _geom_hbond_distance_DH 
 _geom_hbond_distance_HA 
 _geom_hbond_distance_DA 
 _geom_hbond_angle_DHA 
 _geom_hbond_site_symmetry_A 
N12 H12B O9  0.91 2.14 2.8886(12) 138.5 1_556 
N12 H12C N4  0.91 1.87 2.7796(13) 176.9 3_656 
 
_diffrn_measured_fraction_theta_max    0.995 
_diffrn_reflns_theta_full              28.31 
_diffrn_measured_fraction_theta_full   0.995 
_refine_diff_density_max    0.373 
_refine_diff_density_min   -0.254 
_refine_diff_density_rms    0.043 


#==========================================================================

data_compound18 
 
_audit_creation_date '2009-05-07'
_audit_creation_method  'from SHELXTL CIF, local template and enCIFer'
_chemical_name_systematic 
; 
 1,3-diazido-2-(azidomethyl)propan-2-aminium dicyanoimide 
; 
_chemical_name_common             ? 
_chemical_melting_point           ? 
_chemical_formula_moiety          
 'C4 H9 N10 +1, C2 N3 -1' 
_chemical_formula_sum 
 'C6 H9 N13' 
_chemical_formula_weight          263.26 
 
loop_ 
 _atom_type_symbol 
 _atom_type_description 
 _atom_type_scat_dispersion_real 
 _atom_type_scat_dispersion_imag 
 _atom_type_scat_source 
 'C'  'C'   0.0033   0.0016 
 'International Tables Vol C Tables 4.2.6.8 and 6.1.1.4' 
 'H'  'H'   0.0000   0.0000 
 'International Tables Vol C Tables 4.2.6.8 and 6.1.1.4' 
 'N'  'N'   0.0061   0.0033 
 'International Tables Vol C Tables 4.2.6.8 and 6.1.1.4' 
 
_symmetry_cell_setting            Monoclinic 
_symmetry_space_group_name_H-M    P2(1)/n 
 
loop_ 
 _symmetry_equiv_pos_as_xyz 
 'x, y, z' 
 '-x+1/2, y+1/2, -z+1/2' 
 '-x, -y, -z' 
 'x-1/2, -y-1/2, z-1/2' 
 
_cell_length_a                    11.4871(5) 
_cell_length_b                    8.5229(3) 
_cell_length_c                    12.8121(5) 
_cell_angle_alpha                 90.00 
_cell_angle_beta                  95.3950(10) 
_cell_angle_gamma                 90.00 
_cell_volume                      1248.79(9) 
_cell_formula_units_Z             4 
_cell_measurement_temperature     293(2) 
_cell_measurement_reflns_used     ? 
_cell_measurement_theta_min       ? 
_cell_measurement_theta_max       ? 
 
_exptl_crystal_description        irregular 
_exptl_crystal_colour             colorless
_exptl_crystal_size_max           0.85 
_exptl_crystal_size_mid           0.40 
_exptl_crystal_size_min           0.11 
_exptl_crystal_density_meas       ? 
_exptl_crystal_density_diffrn     1.400 
_exptl_crystal_density_method     'not measured' 
_exptl_crystal_F_000              544 
_exptl_absorpt_coefficient_mu     0.106 
_exptl_absorpt_correction_type    'multi-scan'
_exptl_absorpt_process_details 
 'SADABS v2008/1 (Bruker, 2008)'
_exptl_absorpt_correction_T_min   0.677
_exptl_absorpt_correction_T_max   0.746 
 
_exptl_special_details 
; 
 ? 
; 
 
_diffrn_ambient_temperature       293(2) 
_diffrn_radiation_wavelength      0.71073 
_diffrn_radiation_type           'MoK\a'
_diffrn_radiation_source         'fine focus sealed tube'
_diffrn_radiation_monochromator   graphite 
_diffrn_measurement_device_type  'Bruker SMART APEX II CCD'
_diffrn_measurement_method       '\w scans' 
_diffrn_detector_area_resol_mean  ? 
_diffrn_standards_number          ? 
_diffrn_standards_interval_count  ? 
_diffrn_standards_interval_time   ? 
_diffrn_standards_decay_%         ? 
_diffrn_reflns_number             14520 
_diffrn_reflns_av_R_equivalents   0.0232 
_diffrn_reflns_av_sigmaI/netI     0.0180 
_diffrn_reflns_limit_h_min        -15 
_diffrn_reflns_limit_h_max        15 
_diffrn_reflns_limit_k_min        -11 
_diffrn_reflns_limit_k_max        11 
_diffrn_reflns_limit_l_min        -17 
_diffrn_reflns_limit_l_max        17 
_diffrn_reflns_theta_min          2.28 
_diffrn_reflns_theta_max          29.72 
_reflns_number_total              3484 
_reflns_number_gt                 2789 
_reflns_threshold_expression      I>2\s(I)
 
_computing_data_collection        'Bruker APEX2 v2009.3-0 (Bruker, 2006)'
_computing_cell_refinement        'Bruker APEX2 v2009.3-0 (Bruker, 2006)'
_computing_data_reduction         
;
Bruker SAINT v7.60A (Bruker, 2009), Bruker XPREP v2008/2 (Bruker, 2008)
;
_computing_structure_solution     'Bruker SHELXTL v6.12 (Bruker, 2000b)' 
_computing_structure_refinement   'Bruker SHELXTL v6.12 (Bruker, 2000b)' 
_computing_molecular_graphics     'Bruker SHELXTL v6.12 (Bruker, 2000b)'
_computing_publication_material   'Bruker SHELXTL v6.12 (Bruker, 2000b)'
 
_refine_special_details 
; 
 Refinement of F^2^ against ALL reflections.  The weighted R-factor wR and 
 goodness of fit S are based on F^2^, conventional R-factors R are based 
 on F, with F set to zero for negative F^2^. The threshold expression of 
 F^2^ > 2sigma(F^2^) is used only for calculating R-factors(gt) etc. and is 
 not relevant to the choice of reflections for refinement.  R-factors based 
 on F^2^ are statistically about twice as large as those based on F, and R- 
 factors based on ALL data will be even larger. 
; 
 
_refine_ls_structure_factor_coef  Fsqd  
_refine_ls_matrix_type            full 
_refine_ls_weighting_scheme       calc  
_refine_ls_weighting_details 
 'calc w=1/[\s^2^(Fo^2^)+(0.0638P)^2^+0.2691P] where P=(Fo^2^+2Fc^2^)/3' 
_atom_sites_solution_primary      direct 
_atom_sites_solution_secondary    difmap 
_atom_sites_solution_hydrogens    geom 
_refine_ls_hydrogen_treatment     constr 
_refine_ls_extinction_method      none 
_refine_ls_extinction_coef        ? 
_refine_ls_number_reflns          3484 
_refine_ls_number_parameters      172 
_refine_ls_number_restraints      0 
_refine_ls_R_factor_all           0.0582 
_refine_ls_R_factor_gt            0.0471 
_refine_ls_wR_factor_ref          0.1371 
_refine_ls_wR_factor_gt           0.1286 
_refine_ls_goodness_of_fit_ref    1.056 
_refine_ls_restrained_S_all       1.056 
_refine_ls_shift/su_max           0.000 
_refine_ls_shift/su_mean          0.000 
 
loop_ 
 _atom_site_label 
 _atom_site_type_symbol 
 _atom_site_fract_x 
 _atom_site_fract_y 
 _atom_site_fract_z 
 _atom_site_U_iso_or_equiv 
 _atom_site_adp_type 
 _atom_site_occupancy 
 _atom_site_symmetry_multiplicity 
 _atom_site_calc_flag 
 _atom_site_refinement_flags 
 _atom_site_disorder_assembly 
 _atom_site_disorder_group 
C1 C 0.74572(9) 0.16082(13) 0.01787(9) 0.0332(2) Uani 1 1 d . . . 
N2 N 0.80667(9) 0.00860(11) 0.00263(8) 0.0378(2) Uani 1 1 d . . . 
H2A H 0.8419 0.0126 -0.0563 0.057 Uiso 1 1 calc R . . 
H2B H 0.7547 -0.0691 -0.0016 0.057 Uiso 1 1 calc R . . 
H2C H 0.8597 -0.0083 0.0567 0.057 Uiso 1 1 calc R . . 
C3 C 0.65069(11) 0.18548(16) -0.07244(10) 0.0425(3) Uani 1 1 d . . . 
H3A H 0.5923 0.1033 -0.0720 0.051 Uiso 1 1 calc R . . 
H3B H 0.6124 0.2856 -0.0646 0.051 Uiso 1 1 calc R . . 
N4 N 0.70524(12) 0.18209(19) -0.17190(10) 0.0621(4) Uani 1 1 d . . . 
N5 N 0.64693(14) 0.1238(2) -0.24606(11) 0.0710(4) Uani 1 1 d . . . 
N6 N 0.6013(2) 0.0740(4) -0.32025(16) 0.1227(9) Uani 1 1 d . . . 
C7 C 0.83934(10) 0.28824(13) 0.02083(10) 0.0365(3) Uani 1 1 d . . . 
H7A H 0.9030 0.2641 0.0736 0.044 Uiso 1 1 calc R . . 
H7B H 0.8705 0.2968 -0.0467 0.044 Uiso 1 1 calc R . . 
N8 N 0.78174(11) 0.43548(14) 0.04680(13) 0.0597(4) Uani 1 1 d . . . 
N9 N 0.84256(11) 0.55053(14) 0.05970(11) 0.0523(3) Uani 1 1 d . . . 
N10 N 0.88718(16) 0.66632(18) 0.07506(19) 0.0909(6) Uani 1 1 d . . . 
C11 C 0.68580(11) 0.15151(16) 0.11972(10) 0.0418(3) Uani 1 1 d . . . 
H11A H 0.6563 0.2545 0.1359 0.050 Uiso 1 1 calc R . . 
H11B H 0.6197 0.0806 0.1097 0.050 Uiso 1 1 calc R . . 
N12 N 0.76593(11) 0.09649(14) 0.20863(9) 0.0479(3) Uani 1 1 d . . . 
N13 N 0.81995(11) 0.19908(15) 0.26050(9) 0.0504(3) Uani 1 1 d . . . 
N14 N 0.87522(16) 0.2792(2) 0.31426(13) 0.0824(5) Uani 1 1 d . . . 
N15 N 0.55144(16) -0.44276(17) -0.16056(11) 0.0711(4) Uani 1 1 d . . . 
C16 C 0.54179(12) -0.46458(15) -0.26098(11) 0.0448(3) Uani 1 1 d . . . 
N17 N 0.52710(12) -0.49929(16) -0.34794(10) 0.0576(3) Uani 1 1 d . . . 
C18 C 0.59752(12) -0.31680(17) -0.11752(12) 0.0493(3) Uani 1 1 d . . . 
N19 N 0.63367(15) -0.21154(18) -0.07046(13) 0.0714(4) Uani 1 1 d . . . 
 
loop_ 
 _atom_site_aniso_label 
 _atom_site_aniso_U_11 
 _atom_site_aniso_U_22 
 _atom_site_aniso_U_33 
 _atom_site_aniso_U_23 
 _atom_site_aniso_U_13 
 _atom_site_aniso_U_12 
C1 0.0335(5) 0.0291(5) 0.0353(5) 0.0005(4) -0.0051(4) -0.0004(4) 
N2 0.0421(5) 0.0305(5) 0.0384(5) -0.0010(4) -0.0081(4) 0.0012(4) 
C3 0.0388(6) 0.0435(7) 0.0426(6) 0.0023(5) -0.0102(5) 0.0025(5) 
N4 0.0558(7) 0.0896(10) 0.0379(6) 0.0027(6) -0.0116(5) 0.0001(7) 
N5 0.0675(9) 0.0918(11) 0.0501(7) -0.0126(7) -0.0129(6) 0.0191(8) 
N6 0.1154(17) 0.180(3) 0.0673(11) -0.0525(14) -0.0213(11) 0.0101(17) 
C7 0.0356(5) 0.0313(5) 0.0421(6) -0.0004(4) 0.0010(5) -0.0019(4) 
N8 0.0492(7) 0.0333(6) 0.0975(11) -0.0113(6) 0.0114(7) -0.0042(5) 
N9 0.0518(7) 0.0353(6) 0.0700(8) -0.0033(5) 0.0069(6) -0.0027(5) 
N10 0.0776(11) 0.0429(8) 0.1534(18) -0.0182(9) 0.0174(11) -0.0145(7) 
C11 0.0353(6) 0.0470(7) 0.0427(6) 0.0039(5) 0.0010(5) -0.0036(5) 
N12 0.0546(7) 0.0491(6) 0.0391(6) 0.0050(5) -0.0013(5) -0.0021(5) 
N13 0.0547(7) 0.0557(7) 0.0396(6) -0.0024(5) -0.0015(5) 0.0074(5) 
N14 0.0951(12) 0.0756(11) 0.0695(10) -0.0196(8) -0.0295(9) 0.0074(9) 
N15 0.1074(12) 0.0534(8) 0.0507(7) -0.0065(6) -0.0023(7) -0.0266(8) 
C16 0.0424(7) 0.0374(6) 0.0530(8) -0.0012(5) -0.0040(5) -0.0066(5) 
N17 0.0582(8) 0.0631(8) 0.0498(7) -0.0064(6) -0.0033(6) -0.0143(6) 
C18 0.0464(7) 0.0472(7) 0.0526(8) -0.0057(6) -0.0038(6) -0.0021(6) 
N19 0.0795(10) 0.0597(9) 0.0724(9) -0.0191(7) -0.0067(8) -0.0179(7) 
 
_geom_special_details 
; 
 All esds (except the esd in the dihedral angle between two l.s. planes) 
 are estimated using the full covariance matrix.  The cell esds are taken 
 into account individually in the estimation of esds in distances, angles 
 and torsion angles; correlations between esds in cell parameters are only 
 used when they are defined by crystal symmetry.  An approximate (isotropic) 
 treatment of cell esds is used for estimating esds involving l.s. planes. 
; 
 
loop_ 
 _geom_bond_atom_site_label_1 
 _geom_bond_atom_site_label_2 
 _geom_bond_distance 
 _geom_bond_site_symmetry_2 
 _geom_bond_publ_flag 
C1 N2 1.4957(14) . ? 
C1 C7 1.5263(15) . ? 
C1 C3 1.5288(16) . ? 
C1 C11 1.5335(17) . ? 
N2 H2A 0.8900 . ? 
N2 H2B 0.8900 . ? 
N2 H2C 0.8900 . ? 
C3 N4 1.4723(19) . ? 
C3 H3A 0.9700 . ? 
C3 H3B 0.9700 . ? 
N4 N5 1.2161(19) . ? 
N5 N6 1.124(2) . ? 
C7 N8 1.4713(16) . ? 
C7 H7A 0.9700 . ? 
C7 H7B 0.9700 . ? 
N8 N9 1.2063(17) . ? 
N9 N10 1.1209(19) . ? 
C11 N12 1.4723(17) . ? 
C11 H11A 0.9700 . ? 
C11 H11B 0.9700 . ? 
N12 N13 1.2303(17) . ? 
N13 N14 1.1230(19) . ? 
N15 C16 1.294(2) . ? 
N15 C18 1.2968(19) . ? 
C16 N17 1.1498(18) . ? 
C18 N19 1.1375(19) . ? 
 
loop_ 
 _geom_angle_atom_site_label_1 
 _geom_angle_atom_site_label_2 
 _geom_angle_atom_site_label_3 
 _geom_angle 
 _geom_angle_site_symmetry_1 
 _geom_angle_site_symmetry_3 
 _geom_angle_publ_flag 
N2 C1 C7 106.45(9) . . ? 
N2 C1 C3 109.27(9) . . ? 
C7 C1 C3 111.86(10) . . ? 
N2 C1 C11 108.62(9) . . ? 
C7 C1 C11 112.78(10) . . ? 
C3 C1 C11 107.78(10) . . ? 
C1 N2 H2A 109.5 . . ? 
C1 N2 H2B 109.5 . . ? 
H2A N2 H2B 109.5 . . ? 
C1 N2 H2C 109.5 . . ? 
H2A N2 H2C 109.5 . . ? 
H2B N2 H2C 109.5 . . ? 
N4 C3 C1 108.70(10) . . ? 
N4 C3 H3A 109.9 . . ? 
C1 C3 H3A 109.9 . . ? 
N4 C3 H3B 109.9 . . ? 
C1 C3 H3B 109.9 . . ? 
H3A C3 H3B 108.3 . . ? 
N5 N4 C3 115.87(14) . . ? 
N6 N5 N4 173.4(2) . . ? 
N8 C7 C1 106.36(10) . . ? 
N8 C7 H7A 110.5 . . ? 
C1 C7 H7A 110.5 . . ? 
N8 C7 H7B 110.5 . . ? 
C1 C7 H7B 110.5 . . ? 
H7A C7 H7B 108.6 . . ? 
N9 N8 C7 117.22(12) . . ? 
N10 N9 N8 171.54(16) . . ? 
N12 C11 C1 112.14(10) . . ? 
N12 C11 H11A 109.2 . . ? 
C1 C11 H11A 109.2 . . ? 
N12 C11 H11B 109.2 . . ? 
C1 C11 H11B 109.2 . . ? 
H11A C11 H11B 107.9 . . ? 
N13 N12 C11 116.00(12) . . ? 
N14 N13 N12 172.14(16) . . ? 
C16 N15 C18 122.34(14) . . ? 
N17 C16 N15 172.40(15) . . ? 
N19 C18 N15 172.91(18) . . ? 
 
loop_ 
 _geom_torsion_atom_site_label_1 
 _geom_torsion_atom_site_label_2 
 _geom_torsion_atom_site_label_3 
 _geom_torsion_atom_site_label_4 
 _geom_torsion 
 _geom_torsion_site_symmetry_1 
 _geom_torsion_site_symmetry_2 
 _geom_torsion_site_symmetry_3 
 _geom_torsion_site_symmetry_4 
 _geom_torsion_publ_flag 
N2 C1 C3 N4 -57.65(13) . . . . ? 
C7 C1 C3 N4 59.96(14) . . . . ? 
C11 C1 C3 N4 -175.51(11) . . . . ? 
C1 C3 N4 N5 144.85(15) . . . . ? 
C3 N4 N5 N6 175(2) . . . . ? 
N2 C1 C7 N8 -174.22(10) . . . . ? 
C3 C1 C7 N8 66.48(13) . . . . ? 
C11 C1 C7 N8 -55.21(13) . . . . ? 
C1 C7 N8 N9 175.42(14) . . . . ? 
C7 N8 N9 N10 -174.8(13) . . . . ? 
N2 C1 C11 N12 50.21(13) . . . . ? 
C7 C1 C11 N12 -67.54(13) . . . . ? 
C3 C1 C11 N12 168.49(11) . . . . ? 
C1 C11 N12 N13 90.94(14) . . . . ? 
C11 N12 N13 N14 -177.6(12) . . . . ? 
C18 N15 C16 N17 -177.5(12) . . . . ? 
C16 N15 C18 N19 169.1(14) . . . . ? 
 
loop_ 
 _geom_hbond_atom_site_label_D 
 _geom_hbond_atom_site_label_H 
 _geom_hbond_atom_site_label_A 
 _geom_hbond_distance_DH 
 _geom_hbond_distance_HA 
 _geom_hbond_distance_DA 
 _geom_hbond_angle_DHA 
 _geom_hbond_site_symmetry_A 
N2 H2A N17  0.89 2.03 2.8793(18) 158.8 2_654 
N2 H2B N19  0.89 1.99 2.8277(17) 156.7 . 
N2 H2C N17  0.89 2.18 3.0285(16) 159.1 4_656 
 
_diffrn_measured_fraction_theta_max    0.984 
_diffrn_reflns_theta_full              29.72 
_diffrn_measured_fraction_theta_full   0.984 
_refine_diff_density_max    0.304 
_refine_diff_density_min   -0.239 
_refine_diff_density_rms    0.040 


#==========================================================================
 
data_compound20 
 
_audit_creation_date '2009-02-11'
_audit_creation_method  'from SHELXTL CIF, local template and enCIFer'
_chemical_name_systematic 
; 
 1-(1,3-diazido-2-(azidomethyl)propan-2-yl)-3-nitrourea
; 
_chemical_name_common             ? 
_chemical_melting_point           ? 
_chemical_formula_moiety          
 'C5 H8 N12 O3' 
_chemical_formula_sum 
 'C5 H8 N12 O3' 
_chemical_formula_weight          284.23 
 
loop_ 
 _atom_type_symbol 
 _atom_type_description 
 _atom_type_scat_dispersion_real 
 _atom_type_scat_dispersion_imag 
 _atom_type_scat_source 
 'C'  'C'   0.0033   0.0016 
 'International Tables Vol C Tables 4.2.6.8 and 6.1.1.4' 
 'H'  'H'   0.0000   0.0000 
 'International Tables Vol C Tables 4.2.6.8 and 6.1.1.4' 
 'N'  'N'   0.0061   0.0033 
 'International Tables Vol C Tables 4.2.6.8 and 6.1.1.4' 
 'O'  'O'   0.0106   0.0060 
 'International Tables Vol C Tables 4.2.6.8 and 6.1.1.4' 
 
_symmetry_cell_setting            Monoclinic 
_symmetry_space_group_name_H-M    C2/c 
 
loop_ 
 _symmetry_equiv_pos_as_xyz 
 'x, y, z' 
 '-x, y, -z+1/2' 
 'x+1/2, y+1/2, z' 
 '-x+1/2, y+1/2, -z+1/2' 
 '-x, -y, -z' 
 'x, -y, z-1/2' 
 '-x+1/2, -y+1/2, -z' 
 'x+1/2, -y+1/2, z-1/2' 
 
_cell_length_a                    15.6078(18) 
_cell_length_b                    6.2557(7) 
_cell_length_c                    24.224(3) 
_cell_angle_alpha                 90.00 
_cell_angle_beta                  92.481(2) 
_cell_angle_gamma                 90.00 
_cell_volume                      2362.9(5) 
_cell_formula_units_Z             8 
_cell_measurement_temperature     93(2) 
_cell_measurement_reflns_used     ? 
_cell_measurement_theta_min       ? 
_cell_measurement_theta_max       ? 
 
_exptl_crystal_description        'thin plate' 
_exptl_crystal_colour             colorless 
_exptl_crystal_size_max           0.24 
_exptl_crystal_size_mid           0.10 
_exptl_crystal_size_min           0.04 
_exptl_crystal_density_meas       ? 
_exptl_crystal_density_diffrn     1.598 
_exptl_crystal_density_method     'not measured' 
_exptl_crystal_F_000              1168 
_exptl_absorpt_coefficient_mu     0.134 
_exptl_absorpt_correction_type    'multi-scan'
_exptl_absorpt_process_details 
 'SADABS v2004/1 (Bruker, 2004)'
_exptl_absorpt_correction_T_min   0.899 
_exptl_absorpt_correction_T_max   1.000
 
_exptl_special_details 
; 
 ? 
; 
 
_diffrn_ambient_temperature       93(2) 
_diffrn_radiation_wavelength      0.71073 
_diffrn_radiation_type           'MoK\a'
_diffrn_radiation_source         'fine focus sealed tube'
_diffrn_radiation_monochromator   graphite 
_diffrn_measurement_device_type  'Bruker SMART APEX II CCD'
_diffrn_measurement_method       '\w scans'
_diffrn_detector_area_resol_mean  ? 
_diffrn_standards_number          ? 
_diffrn_standards_interval_count  ? 
_diffrn_standards_interval_time   ? 
_diffrn_standards_decay_%         ? 
_diffrn_reflns_number             11919 
_diffrn_reflns_av_R_equivalents   0.0187 
_diffrn_reflns_av_sigmaI/netI     0.0165 
_diffrn_reflns_limit_h_min        -20 
_diffrn_reflns_limit_h_max        20 
_diffrn_reflns_limit_k_min        -7 
_diffrn_reflns_limit_k_max        8 
_diffrn_reflns_limit_l_min        -32 
_diffrn_reflns_limit_l_max        32 
_diffrn_reflns_theta_min          1.68 
_diffrn_reflns_theta_max          28.43 
_reflns_number_total              2981 
_reflns_number_gt                 2693 
_reflns_threshold_expression      I>2\s(I) 
 
_computing_data_collection        'Bruker APEX2 v2.1-0 (Bruker, 2006)'
_computing_cell_refinement        'Bruker APEX2 v2.1-0 (Bruker, 2006)'
_computing_data_reduction         
;
Bruker SAINT v7.34A (Bruker, 2005), Bruker XPREP v2005/2 (Bruker, 2004)
;
_computing_structure_solution     'Bruker SHELXTL v6.12 (Bruker, 2000b)' 
_computing_structure_refinement   'Bruker SHELXTL v6.12 (Bruker, 2000b)' 
_computing_molecular_graphics     'Bruker SHELXTL v6.12 (Bruker, 2000b)'
_computing_publication_material   'Bruker SHELXTL v6.12 (Bruker, 2000b)'
 
_refine_special_details 
; 
 Refinement of F^2^ against ALL reflections.  The weighted R-factor wR and 
 goodness of fit S are based on F^2^, conventional R-factors R are based 
 on F, with F set to zero for negative F^2^. The threshold expression of 
 F^2^ > 2sigma(F^2^) is used only for calculating R-factors(gt) etc. and is 
 not relevant to the choice of reflections for refinement.  R-factors based 
 on F^2^ are statistically about twice as large as those based on F, and R- 
 factors based on ALL data will be even larger. 
; 
 
_refine_ls_structure_factor_coef  Fsqd  
_refine_ls_matrix_type            full 
_refine_ls_weighting_scheme       calc  
_refine_ls_weighting_details 
 'calc w=1/[\s^2^(Fo^2^)+(0.0403P)^2^+1.8141P] where P=(Fo^2^+2Fc^2^)/3' 
_atom_sites_solution_primary      direct 
_atom_sites_solution_secondary    difmap 
_atom_sites_solution_hydrogens    geom 
_refine_ls_hydrogen_treatment     constr 
_refine_ls_extinction_method      none 
_refine_ls_extinction_coef        ? 
_refine_ls_number_reflns          2981 
_refine_ls_number_parameters      181 
_refine_ls_number_restraints      0 
_refine_ls_R_factor_all           0.0347 
_refine_ls_R_factor_gt            0.0306 
_refine_ls_wR_factor_ref          0.0822 
_refine_ls_wR_factor_gt           0.0790 
_refine_ls_goodness_of_fit_ref    1.035 
_refine_ls_restrained_S_all       1.035 
_refine_ls_shift/su_max           0.000 
_refine_ls_shift/su_mean          0.000 
 
loop_ 
 _atom_site_label 
 _atom_site_type_symbol 
 _atom_site_fract_x 
 _atom_site_fract_y 
 _atom_site_fract_z 
 _atom_site_U_iso_or_equiv 
 _atom_site_adp_type 
 _atom_site_occupancy 
 _atom_site_symmetry_multiplicity 
 _atom_site_calc_flag 
 _atom_site_refinement_flags 
 _atom_site_disorder_assembly 
 _atom_site_disorder_group 
C1 C 0.16264(6) 0.84685(15) 0.39165(4) 0.01300(18) Uani 1 1 d . . . 
N2 N 0.16835(5) 0.86212(14) 0.33128(3) 0.01405(17) Uani 1 1 d . . . 
H2 H 0.2145 0.8121 0.3161 0.017 Uiso 1 1 calc R . . 
C3 C 0.10677(6) 0.94824(15) 0.29861(4) 0.01367(19) Uani 1 1 d . . . 
O4 O 0.03929(4) 1.02462(12) 0.31436(3) 0.01662(16) Uani 1 1 d . . . 
N5 N 0.11660(5) 0.95152(14) 0.24105(3) 0.01537(18) Uani 1 1 d . . . 
H5 H 0.0773 1.0228 0.2215 0.018 Uiso 1 1 calc R . . 
N6 N 0.17954(5) 0.85796(14) 0.21170(3) 0.01598(17) Uani 1 1 d . . . 
O7 O 0.16623(5) 0.85558(14) 0.16152(3) 0.02222(18) Uani 1 1 d . . . 
O8 O 0.24409(5) 0.78746(14) 0.23630(3) 0.02232(18) Uani 1 1 d . . . 
C9 C 0.07827(6) 0.74129(16) 0.40815(4) 0.0163(2) Uani 1 1 d . . . 
H9A H 0.0794 0.7208 0.4487 0.020 Uiso 1 1 calc R . . 
H9B H 0.0294 0.8360 0.3977 0.020 Uiso 1 1 calc R . . 
N10 N 0.06659(6) 0.53211(15) 0.38029(4) 0.0216(2) Uani 1 1 d . . . 
N11 N 0.00961(6) 0.52642(14) 0.34311(4) 0.01907(19) Uani 1 1 d . . . 
N12 N -0.04083(7) 0.49776(18) 0.30908(5) 0.0311(2) Uani 1 1 d . . . 
C13 C 0.17114(6) 1.07409(16) 0.41512(4) 0.01515(19) Uani 1 1 d . . . 
H13A H 0.2254 1.1392 0.4037 0.018 Uiso 1 1 calc R . . 
H13B H 0.1230 1.1636 0.4005 0.018 Uiso 1 1 calc R . . 
N14 N 0.17028(6) 1.06488(15) 0.47644(4) 0.01964(19) Uani 1 1 d . . . 
N15 N 0.13477(5) 1.21924(15) 0.49784(4) 0.01803(18) Uani 1 1 d . . . 
N16 N 0.10451(7) 1.35115(17) 0.52233(4) 0.0273(2) Uani 1 1 d . . . 
C17 C 0.23680(6) 0.70457(16) 0.41229(4) 0.01492(19) Uani 1 1 d . . . 
H17A H 0.2395 0.6998 0.4532 0.018 Uiso 1 1 calc R . . 
H17B H 0.2285 0.5571 0.3982 0.018 Uiso 1 1 calc R . . 
N18 N 0.31726(5) 0.79565(15) 0.39198(4) 0.01945(19) Uani 1 1 d . . . 
N19 N 0.38340(5) 0.72243(14) 0.41463(3) 0.01621(18) Uani 1 1 d . . . 
N20 N 0.44791(6) 0.66968(16) 0.43280(4) 0.0214(2) Uani 1 1 d . . . 
 
loop_ 
 _atom_site_aniso_label 
 _atom_site_aniso_U_11 
 _atom_site_aniso_U_22 
 _atom_site_aniso_U_33 
 _atom_site_aniso_U_23 
 _atom_site_aniso_U_13 
 _atom_site_aniso_U_12 
C1 0.0146(4) 0.0120(4) 0.0123(4) 0.0013(3) -0.0005(3) 0.0016(3) 
N2 0.0133(4) 0.0153(4) 0.0135(4) 0.0002(3) 0.0002(3) 0.0030(3) 
C3 0.0148(4) 0.0114(4) 0.0147(4) -0.0008(3) -0.0010(3) -0.0018(3) 
O4 0.0137(3) 0.0198(4) 0.0162(3) -0.0018(3) -0.0017(3) 0.0033(3) 
N5 0.0137(4) 0.0180(4) 0.0143(4) 0.0000(3) -0.0009(3) 0.0025(3) 
N6 0.0172(4) 0.0142(4) 0.0167(4) 0.0010(3) 0.0024(3) -0.0010(3) 
O7 0.0267(4) 0.0263(4) 0.0139(3) 0.0022(3) 0.0034(3) 0.0003(3) 
O8 0.0186(4) 0.0268(4) 0.0216(4) 0.0019(3) 0.0015(3) 0.0081(3) 
C9 0.0156(4) 0.0136(5) 0.0197(5) 0.0017(4) 0.0013(3) 0.0007(4) 
N10 0.0180(4) 0.0138(4) 0.0323(5) 0.0010(4) -0.0049(4) 0.0006(3) 
N11 0.0181(4) 0.0134(4) 0.0259(5) 0.0006(3) 0.0028(3) 0.0011(3) 
N12 0.0314(5) 0.0254(5) 0.0356(6) -0.0062(4) -0.0088(4) 0.0040(4) 
C13 0.0185(4) 0.0125(4) 0.0143(4) 0.0006(3) -0.0010(3) 0.0019(4) 
N14 0.0264(5) 0.0172(4) 0.0151(4) -0.0015(3) -0.0016(3) 0.0066(4) 
N15 0.0175(4) 0.0189(4) 0.0175(4) -0.0014(3) -0.0012(3) -0.0002(3) 
N16 0.0296(5) 0.0262(5) 0.0260(5) -0.0076(4) 0.0019(4) 0.0051(4) 
C17 0.0139(4) 0.0136(4) 0.0172(4) 0.0018(3) -0.0007(3) 0.0018(3) 
N18 0.0137(4) 0.0195(4) 0.0249(4) 0.0063(4) -0.0025(3) 0.0017(3) 
N19 0.0164(4) 0.0141(4) 0.0181(4) -0.0008(3) 0.0009(3) 0.0003(3) 
N20 0.0154(4) 0.0229(5) 0.0257(5) 0.0017(4) -0.0007(3) 0.0025(3) 
 
_geom_special_details 
; 
 All esds (except the esd in the dihedral angle between two l.s. planes) 
 are estimated using the full covariance matrix.  The cell esds are taken 
 into account individually in the estimation of esds in distances, angles 
 and torsion angles; correlations between esds in cell parameters are only 
 used when they are defined by crystal symmetry.  An approximate (isotropic) 
 treatment of cell esds is used for estimating esds involving l.s. planes. 
; 
 
loop_ 
 _geom_bond_atom_site_label_1 
 _geom_bond_atom_site_label_2 
 _geom_bond_distance 
 _geom_bond_site_symmetry_2 
 _geom_bond_publ_flag 
C1 N2 1.4720(12) . ? 
C1 C17 1.5271(13) . ? 
C1 C13 1.5347(14) . ? 
C1 C9 1.5411(13) . ? 
N2 C3 1.3321(12) . ? 
N2 H2 0.8800 . ? 
C3 O4 1.2320(12) . ? 
C3 N5 1.4093(12) . ? 
N5 N6 1.3689(12) . ? 
N5 H5 0.8800 . ? 
N6 O7 1.2242(11) . ? 
N6 O8 1.2300(11) . ? 
C9 N10 1.4800(14) . ? 
C9 H9A 0.9900 . ? 
C9 H9B 0.9900 . ? 
N10 N11 1.2386(13) . ? 
N11 N12 1.1293(14) . ? 
C13 N14 1.4872(12) . ? 
C13 H13A 0.9900 . ? 
C13 H13B 0.9900 . ? 
N14 N15 1.2382(13) . ? 
N15 N16 1.1315(13) . ? 
C17 N18 1.4823(13) . ? 
C17 H17A 0.9900 . ? 
C17 H17B 0.9900 . ? 
N18 N19 1.2360(12) . ? 
N19 N20 1.1305(12) . ? 
 
loop_ 
 _geom_angle_atom_site_label_1 
 _geom_angle_atom_site_label_2 
 _geom_angle_atom_site_label_3 
 _geom_angle 
 _geom_angle_site_symmetry_1 
 _geom_angle_site_symmetry_3 
 _geom_angle_publ_flag 
N2 C1 C17 106.58(8) . . ? 
N2 C1 C13 107.45(8) . . ? 
C17 C1 C13 111.49(8) . . ? 
N2 C1 C9 112.01(8) . . ? 
C17 C1 C9 108.02(8) . . ? 
C13 C1 C9 111.22(8) . . ? 
C3 N2 C1 122.90(8) . . ? 
C3 N2 H2 118.5 . . ? 
C1 N2 H2 118.5 . . ? 
O4 C3 N2 125.27(9) . . ? 
O4 C3 N5 115.58(8) . . ? 
N2 C3 N5 119.14(9) . . ? 
N6 N5 C3 128.24(8) . . ? 
N6 N5 H5 115.9 . . ? 
C3 N5 H5 115.9 . . ? 
O7 N6 O8 125.24(9) . . ? 
O7 N6 N5 115.22(8) . . ? 
O8 N6 N5 119.52(8) . . ? 
N10 C9 C1 110.51(8) . . ? 
N10 C9 H9A 109.5 . . ? 
C1 C9 H9A 109.5 . . ? 
N10 C9 H9B 109.5 . . ? 
C1 C9 H9B 109.5 . . ? 
H9A C9 H9B 108.1 . . ? 
N11 N10 C9 115.30(9) . . ? 
N12 N11 N10 172.44(11) . . ? 
N14 C13 C1 109.25(8) . . ? 
N14 C13 H13A 109.8 . . ? 
C1 C13 H13A 109.8 . . ? 
N14 C13 H13B 109.8 . . ? 
C1 C13 H13B 109.8 . . ? 
H13A C13 H13B 108.3 . . ? 
N15 N14 C13 114.30(8) . . ? 
N16 N15 N14 173.13(11) . . ? 
N18 C17 C1 107.96(8) . . ? 
N18 C17 H17A 110.1 . . ? 
C1 C17 H17A 110.1 . . ? 
N18 C17 H17B 110.1 . . ? 
C1 C17 H17B 110.1 . . ? 
H17A C17 H17B 108.4 . . ? 
N19 N18 C17 114.43(8) . . ? 
N20 N19 N18 173.60(11) . . ? 
 
loop_ 
 _geom_torsion_atom_site_label_1 
 _geom_torsion_atom_site_label_2 
 _geom_torsion_atom_site_label_3 
 _geom_torsion_atom_site_label_4 
 _geom_torsion 
 _geom_torsion_site_symmetry_1 
 _geom_torsion_site_symmetry_2 
 _geom_torsion_site_symmetry_3 
 _geom_torsion_site_symmetry_4 
 _geom_torsion_publ_flag 
C17 C1 N2 C3 169.98(9) . . . . ? 
C13 C1 N2 C3 -70.39(11) . . . . ? 
C9 C1 N2 C3 52.05(12) . . . . ? 
C1 N2 C3 O4 0.30(16) . . . . ? 
C1 N2 C3 N5 -178.43(9) . . . . ? 
O4 C3 N5 N6 -172.14(9) . . . . ? 
N2 C3 N5 N6 6.71(15) . . . . ? 
C3 N5 N6 O7 168.85(9) . . . . ? 
C3 N5 N6 O8 -12.32(15) . . . . ? 
N2 C1 C9 N10 53.60(10) . . . . ? 
C17 C1 C9 N10 -63.48(10) . . . . ? 
C13 C1 C9 N10 173.86(8) . . . . ? 
C1 C9 N10 N11 -108.49(10) . . . . ? 
C9 N10 N11 N12 -172.3(8) . . . . ? 
N2 C1 C13 N14 -177.07(7) . . . . ? 
C17 C1 C13 N14 -60.62(10) . . . . ? 
C9 C1 C13 N14 60.01(10) . . . . ? 
C1 C13 N14 N15 -145.45(9) . . . . ? 
C13 N14 N15 N16 -178(80) . . . . ? 
N2 C1 C17 N18 54.35(10) . . . . ? 
C13 C1 C17 N18 -62.62(10) . . . . ? 
C9 C1 C17 N18 174.89(8) . . . . ? 
C1 C17 N18 N19 166.05(9) . . . . ? 
C17 N18 N19 N20 -172.0(9) . . . . ? 
 
loop_ 
 _geom_hbond_atom_site_label_D 
 _geom_hbond_atom_site_label_H 
 _geom_hbond_atom_site_label_A 
 _geom_hbond_distance_DH 
 _geom_hbond_distance_HA 
 _geom_hbond_distance_DA 
 _geom_hbond_angle_DHA 
 _geom_hbond_site_symmetry_A 
N2 H2 O8  0.88 2.01 2.6728(11) 130.9 . 
N5 H5 O4  0.88 1.98 2.7655(11) 147.6 2 
 
_diffrn_measured_fraction_theta_max    0.997 
_diffrn_reflns_theta_full              28.43 
_diffrn_measured_fraction_theta_full   0.997 
_refine_diff_density_max    0.395 
_refine_diff_density_min   -0.438 
_refine_diff_density_rms    0.042 
